# Supplementary material for: Comparative genomics reveals plasmid-encoded genes associated with Klebsiella infection in colonized patients
Source: Research Square preprint supplement (doi:10.21203/rs.3.rs-1254643/v1), 2022-04-04
Supplement: Supplementary file 1 [file 22530443755ac28be1007f84.xlsx]

## Sheet: output_collapsed_hits_parsimony
Supplementary Table 5. Summary of treeWAS analysis
Locus	Terminal score	Terminal score P value	Simultaneous score	Simultaneous score P value	Subsequent score	Subsequent score P value
aac(6')-Ib-cr5	0.420408	0	4	0.0617647	281.333	0
blaOXA-1	0.404082	0	3	0.0970588	274	0
blaCTX-M-15	0.404082	0	4	0.0617647	276.333	0
group_13461	0.404082	0	3	0.0970588	277	0
group_13458	0.387755	0	4	0.0617647	274.333	0
group_13460	0.395918	0	3	0.0970588	276	0
group_13437	0.387755	0	10	0	270.333	0
group_5875-tehA_2-group_10494	0.363265	0	3	0.0970588	257	0
tnpR	0.387755	0	3	0.0970588	272	0
blaTEM-1	0.404082	0	3	0.0970588	277	0
group_9575	0.412245	0	5	0.0147059	282.667	0
group_13467	0.404082	0	5	0.0147059	284.667	0
group_5455-sul2	0.363265	0	3	0.0970588	263	0
group_13965	0.363265	0	2	0.202941	263.667	0
group_9537	0.363265	0	7	0	272.333	0
group_13443	0.363265	0	7	0	278.333	0
group_7606	0.371429	0	2	0.202941	264.667	0
dgcE	0.363265	0	8	0	247.667	0.00588235
aqpZ_2	0.355102	0	7	0	274.333	0
group_2409	0.346939	0	6	0.00882353	274	0
pdeC_2	0.338776	0	8	0	232.667	0.0588235
sul1	0.363265	0	1	0.438235	264.333	0
qacED1	0.371429	0	2	0.202941	264.667	0
arsD_1	0.338776	0	8	0	265.667	0
group_774	0.297959	0.0205882	6	0.00882353	208	0.158824
group_7231	0.338776	0	10	0	258.333	0
group_9530	0.314286	0.0147059	11	0	233.667	0.0558824
ltrA	0.306122	0.0176471	6	0.00882353	206	0.158824
group_9528	0.338776	0	10	0	246.333	0.0117647
group_622	0.289796	0.0294118	9	0	190	0.25
group_4187	0.314286	0.0147059	9	0	241	0.0352941
umuD_2	0.240816	0.129412	9	0	115	0.591176
umuC_2	0.183673	0.282353	1	0.438235	50.3333	0.902941
group_2513	0.0612245	0.755882	-1	0.438235	117.667	0.582353
