# Supplementary material for: Comparative genomics reveals plasmid-encoded genes associated with Klebsiella infection in colonized patients
Source: Research Square preprint supplement (doi:10.21203/rs.3.rs-1254643/v1), 2022-04-04
Supplement: Supplementary file 2 [file 70c222d0eb5bc3e36145eb83.xlsx]

## Sheet: Sheet1
Supplementary Table 9. Primers and probes used in this study
Target	Forward primer	Reverse primer	Probe
blaCTX-M-15	GCAGATAATTCGCAAATACTTTATCGTGCTGA	TGACGTGCTTTTCCGCAATCGGATTATAGTTA	{ABY}AGCGCTTTGCGATGTGCAGCACCAGTAAAGT{QSY-7}
aqpZ_2	ATTCTGATTATGAGCATCCTAACGACCAGA	AGCGGCCCAGTACAGCCACTGATT	{VIC}TAGCTTCGGGCCGGCATTGGCCATGGGATACT{QSY-7}
group_13461	AAGGTTCCGAATACGACTACTTTTTCTTTGTA	TGAAACACGGCTTCATTCGCCCAAAA	{ABY}AGAGATGACCCACCGCCATGTCGTATTTGG{QSY-7}
group_13467	GCCTGCCACGCTCAATACCGACAAA	CGCGCACCGGCTTGATCAGTATCTT	{VIC}CCGAGCTATGGTGCAGCGATCACCGAATT{QSY-7}
aac(6')-Ib-cr5	GACCAGTTACTGGCGAATGCATCACAA	GCCTCTCAAACCCCGCTTTCTCGTA	{VIC}CTTGGTGACCTCGGGATCATTGAACA GCAACT{QSY-7}
dgcE	GTTATGGGCTGAAGATAAAAGAGACAGATAGA	GCAGTCTTACGGGATGCCCTGCATA	{ABY}AGTGCCCGATGCAAGCCTTGATCCA AGATT{QSY-7}
fiu	AACGTAGCGCAGGATGGATCTTCCG	GACAGATCGCTGGTGGCCTGATA	{FAM}CGTCCACAGCGTAAAGGCATGTT{MGB]
