# Supplementary material for: Comparative genomics reveals plasmid-encoded genes associated with Klebsiella infection in colonized patients
Source: Research Square preprint supplement (doi:10.21203/rs.3.rs-1254643/v1), 2022-04-04
Supplement: Supplementary file 3 [file 927ead026b4febf825d0fab2.xlsx]

## Sheet: plasmidtype_all
Supplementary Table 7. Klebsiella rectal isolate genotyping with PlasmidFinder
Kp number	Category	Stratum	Location	Plasmid	Accession	Coverage
Kp6566	rectal	2	-	None	-	-
Kp6653	rectal	2	NODE_10_length_123809_cov_43.331794:65025..65584:IncFIB(K)_1__JN233704:98.928571	IncFIB(K)	JN233704	100
Kp6653	rectal	2	NODE_10_length_123809_cov_43.331794:1718..1865:IncFII(K)_1__CP000648:95.945946	IncFII(K)	CP000648	100
Kp6653	rectal	2	NODE_22_length_4908_cov_172.455412:686..799:Col440I_1__CP023920:95.614035	Col440I	CP023920	100
Kp6653	rectal	2	NODE_27_length_3978_cov_181.515710:3748..3866:Col(pHAD28)_1__KU674895:83.969466	Col(pHAD28)	KU674895	90.84
Kp6653	rectal	2	NODE_27_length_3978_cov_181.515710:2885..3165:Col440II_1__CP023921:90.425532	Col440II	CP023921	99.65
Kp7028	rectal	2	NODE_19_length_31584_cov_37.485043:28155..28302:IncFII(K)_1__CP000648:100.000000	IncFII(K)	CP000648	100
Kp7028	rectal	2	NODE_16_length_53936_cov_37.293408:19284..19843:IncFIB(K)_1__JN233704:99.464286	IncFIB(K)	JN233704	100
Kp2790	rectal	3	-	None	-	-
Kp2816	rectal	3	NODE_43_length_343_cov_0.273148:141..331:ColpVC_1__JX133088:95.854922	ColpVC	JX133088	98.96
Kp2816	rectal	3	NODE_10_length_189590_cov_44.544877:102003..102562:IncFIB(K)(pCAV1099-114)_1__CP011596:96.071429	IncFIB(K)(pCAV1099-114)	CP011596	100
Kp2841	rectal	3	NODE_13_length_110391_cov_31.333064:77501..78060:IncFIB(pKPHS1)_1__CP003223:99.285714	IncFIB(pKPHS1)	CP003223	100
Kp2841	rectal	3	NODE_15_length_94885_cov_40.245847:87497..87884:IncFIA(HI1)_1__AF250878:96.649485	IncFIA(HI1)	AF250878	100
Kp2841	rectal	3	NODE_15_length_94885_cov_40.245847:19615..19842:IncFII(pKP91)_1__CP000966:94.816784	IncFII(pKP91)	CP000966	98.7
Kp2841	rectal	3	NODE_25_length_4388_cov_155.476883:1304..1433:Col(pHAD28)_1__KU674895:92.418857	Col(pHAD28)	KU674895	99.24
Kp8611	rectal	4	NODE_45_length_16031_cov_42.180458:7816..8066:IncR_1__DQ449578:99.601594	IncR	DQ449578	100
Kp8611	rectal	4	NODE_23_length_55590_cov_67.345239:51675..52249:IncFII(pKPX1)_1__AP012055:90.641248	IncFII(pKPX1)	AP012055	99.65
Kp8833	rectal	4	NODE_24_length_38195_cov_72.517154:5300..5526:FII(pBK30683)_1__KF954760:99.559471	FII(pBK30683)	KF954760	100
Kp8833	rectal	4	NODE_19_length_49873_cov_25.097334:12596..13155:IncFIB(K)_1__JN233704:98.928571	IncFIB(K)	JN233704	100
Kp9161	rectal	4	NODE_11_length_178544_cov_27.344126:61554..61701:IncFII(K)_1__CP000648:100.000000	IncFII(K)	CP000648	100
Kp9161	rectal	4	NODE_15_length_97995_cov_48.567611:3826..4055:IncFII(pKP91)_1__CP000966:100.000000	IncFII(pKP91)	CP000966	100
Kp9161	rectal	4	NODE_11_length_178544_cov_27.344126:87142..87701:IncFIB(K)_1__JN233704:98.750000	IncFIB(K)	JN233704	100
Kp8236	rectal	5	NODE_15_length_31797_cov_33.076539:24394..24953:IncFIB(K)_1__JN233704:98.928571	IncFIB(K)	JN233704	100
Kp8236	rectal	5	NODE_25_length_4198_cov_225.629084:1762..1874:Col440I_1__CP023920:90.427824	Col440I	CP023920	99.12
Kp8399	rectal	5	NODE_26_length_84405_cov_90.694286:24582..24729:IncFII(K)_1__CP000648:100.000000	IncFII(K)	CP000648	100
Kp8399	rectal	5	NODE_39_length_19270_cov_88.592436:7994..8553:IncFIB(K)_1__JN233704:100.000000	IncFIB(K)	JN233704	100
Kp8399	rectal	5	NODE_45_length_11501_cov_89.351064:5881..6131:IncR_1__DQ449578:100.000000	IncR	DQ449578	100
Kp8399	rectal	5	NODE_47_length_9421_cov_130.481278:2629..2758:ColRNAI_1__DQ298019:100.000000	ColRNAI	DQ298019	100
Kp8399	rectal	5	NODE_52_length_5751_cov_98.688834:3232..3547:IncI2(Delta)_1__AP002527:98.417722	IncI2(Delta)	AP002527	100
Kp8678	rectal	5	NODE_37_length_9466_cov_37.590534:3221..3780:IncFIB(K)(pCAV1099-114)_1__CP011596:99.642857	IncFIB(K)(pCAV1099-114)	CP011596	100
Kp8678	rectal	5	NODE_20_length_35554_cov_61.379400:11585..11835:IncR_1__DQ449578:99.203187	IncR	DQ449578	100
Kp8678	rectal	5	NODE_42_length_5945_cov_62.201444:3832..3979:IncFII(K)_1__CP000648:97.972973	IncFII(K)	CP000648	100
Kp8678	rectal	5	NODE_56_length_3882_cov_179.244474:1840..1949:Col440I_1__CP023920:91.228070	Col440I	CP023920	96.49
Kp8139	rectal	7	-	None	-	-
Kp8422	rectal	7	-	None	-	-
Kp8570	rectal	7	NODE_11_length_88343_cov_27.015201:74342..74901:IncFIB(K)_1__JN233704:98.928571	IncFIB(K)	JN233704	100
Kp8570	rectal	7	NODE_13_length_62182_cov_60.660189:37182..37920:IncM1_1__U27345:97.312242	IncM1	U27345	99.59
Kp8570	rectal	7	NODE_27_length_10404_cov_57.083390:1332..1479:IncFII(K)_1__CP000648:95.270270	IncFII(K)	CP000648	100
Kp8570	rectal	7	NODE_32_length_3677_cov_224.879437:1439..1569:Col(pHAD28)_1__KU674895:93.129771	Col(pHAD28)	KU674895	100
Kp3976	rectal	8	NODE_47_length_2043_cov_295.805846:1564..1694:Col(pHAD28)_1__KU674895:100.000000	Col(pHAD28)	KU674895	100
Kp3976	rectal	8	NODE_40_length_14946_cov_32.166610:7384..7943:IncFIB(K)_1__JN233704:98.928571	IncFIB(K)	JN233704	100
Kp3976	rectal	8	NODE_45_length_3671_cov_371.093679:867..1148:Col440II_1__CP023921:97.517730	Col440II	CP023921	100
Kp3976	rectal	8	NODE_30_length_45325_cov_33.101288:43016..43163:IncFII(K)_1__CP000648:97.297297	IncFII(K)	CP000648	100
Kp3976	rectal	8	NODE_48_length_2030_cov_190.021545:55..185:Col(pHAD28)_1__KU674895:93.129771	Col(pHAD28)	KU674895	100
Kp3976	rectal	8	NODE_44_length_4314_cov_248.304992:850..980:Col(pHAD28)_1__KU674895:92.366412	Col(pHAD28)	KU674895	100
Kp4113	rectal	8	NODE_10_length_124996_cov_34.516485:7703..7953:IncR_1__DQ449578:99.601594	IncR	DQ449578	100
Kp4113	rectal	8	NODE_10_length_124996_cov_34.516485:108729..108876:IncFII(K)_1__CP000648:99.324324	IncFII(K)	CP000648	100
Kp4113	rectal	8	NODE_9_length_138328_cov_32.969776:82544..83103:IncFIB(K)_1__JN233704:98.928571	IncFIB(K)	JN233704	100
Kp4113	rectal	8	NODE_10_length_124996_cov_34.516485:43107..43494:IncFIA(HI1)_1__AF250878:98.453608	IncFIA(HI1)	AF250878	100
Kp4113	rectal	8	NODE_24_length_1868_cov_271.021827:980..1170:ColpVC_1__JX133088:96.373057	ColpVC	JX133088	98.96
Kp4113	rectal	8	NODE_20_length_4568_cov_216.434362:2223..2337:Col(pHAD28)_1__KU674895:81.679389	Col(pHAD28)	KU674895	87.79
Kp4539	rectal	8	-	None	-	-
Kp6711	rectal	9	NODE_21_length_52327_cov_34.044464:3595..4154:repB_KLEB_VIR_AP006726:99.821429	repB	AP006726	100
Kp6711	rectal	9	NODE_21_length_52327_cov_34.044464:18985..19554:IncHI1B(pNDM-MAR)_1__JN420336:99.649123	IncHI1B(pNDM-MAR)	JN420336	100
Kp6711	rectal	9	NODE_39_length_4603_cov_241.308758:1547..1677:Col(pHAD28)_1__KU674895:91.603053	Col(pHAD28)	KU674895	100
Kp6711	rectal	9	NODE_41_length_3335_cov_220.541459:1071..1201:Col(pHAD28)_1__KU674895:90.839695	Col(pHAD28)	KU674895	100
Kp6959	rectal	9	NODE_11_length_78501_cov_35.609322:65283..65842:IncFIB(K)_1__JN233704:98.928571	IncFIB(K)	JN233704	100
Kp6959	rectal	9	NODE_11_length_78501_cov_35.609322:1781..1928:IncFII(K)_1__CP000648:95.945946	IncFII(K)	CP000648	100
Kp6959	rectal	9	NODE_23_length_4292_cov_183.290516:1964..2094:Col(pHAD28)_1__KU674895:91.603053	Col(pHAD28)	KU674895	100
Kp6973	rectal	9	NODE_51_length_8119_cov_74.824324:2597..3336:IncFIB(pQil)_1__JN233705:100.000000	IncFIB(pQil)	JN233705	100
Kp6973	rectal	9	NODE_48_length_11213_cov_59.221631:2340..2899:IncFIB(K)_1__JN233704:98.928571	IncFIB(K)	JN233704	100
Kp6973	rectal	9	NODE_57_length_5484_cov_293.557962:4078..4192:Col440I_1__CP023920:97.391304	Col440I	CP023920	100
Kp6973	rectal	9	NODE_36_length_24378_cov_56.096862:9015..9162:IncFII(K)_1__CP000648:97.297297	IncFII(K)	CP000648	100
Kp6973	rectal	9	NODE_39_length_19952_cov_76.707945:18856..19003:IncFII(K)_1__CP000648:95.270270	IncFII(K)	CP000648	100
Kp6973	rectal	9	NODE_91_length_1605_cov_340.877537:290..420:Col(pHAD28)_1__KU674895:93.129771	Col(pHAD28)	KU674895	100
Kp6973	rectal	9	NODE_139_length_565_cov_299.200913:288..418:Col(pHAD28)_1__KU674895:93.129771	Col(pHAD28)	KU674895	100
Kp4078	rectal	10	NODE_16_length_9600_cov_38.853162:3315..3874:IncFIB(K)(pCAV1099-114)_1__CP011596:99.821429	IncFIB(K)(pCAV1099-114)	CP011596	100
Kp4078	rectal	10	NODE_30_length_591_cov_0.310345:107..237:Col(pHAD28)_1__KU674895:94.656489	Col(pHAD28)	KU674895	100
Kp4368	rectal	10	-	None	-	-
Kp4571	rectal	10	NODE_41_length_25860_cov_32.617378:24011..24158:IncFII(K)_1__CP000648:99.324324	IncFII(K)	CP000648	100
Kp4571	rectal	10	NODE_52_length_16272_cov_37.095324:8583..9142:IncFIB(K)_1__JN233704:98.928571	IncFIB(K)	JN233704	100
Kp4571	rectal	10	NODE_71_length_5148_cov_306.929496:4078..4192:Col440I_1__CP023920:97.391304	Col440I	CP023920	100
Kp4571	rectal	10	NODE_159_length_481_cov_412.915254:283..392:Col440I_1__CP023920:92.105263	Col440I	CP023920	96.49
Kp4571	rectal	10	NODE_82_length_3396_cov_338.614255:3283..3390:Col(pHAD28)_1__KU674895:77.099237	Col(pHAD28)	KU674895	82.44
Kp4571	rectal	10	NODE_84_length_3364_cov_298.998764:3185..3315:Col(pHAD28)_1__KU674895:91.603053	Col(pHAD28)	KU674895	100
Kp4571	rectal	10	NODE_82_length_3396_cov_338.614255:14..144:Col(pHAD28)_1__KU674895:90.076336	Col(pHAD28)	KU674895	100
Kp7643	rectal	11	NODE_35_length_24497_cov_73.359089:18354..19093:IncFIB(pQil)_1__JN233705:100.000000	IncFIB(pQil)	JN233705	100
Kp7643	rectal	11	NODE_50_length_10029_cov_50.767118:2340..2899:IncFIB(K)_1__JN233704:98.928571	IncFIB(K)	JN233704	100
Kp7643	rectal	11	NODE_33_length_27540_cov_52.586911:16600..16747:IncFII(K)_1__CP000648:97.297297	IncFII(K)	CP000648	100
Kp7643	rectal	11	NODE_84_length_2622_cov_410.773146:1833..1961:Col(pHAD28)_1__KU674895:94.656489	Col(pHAD28)	KU674895	98.47
Kp7643	rectal	11	NODE_29_length_30970_cov_82.444185:5541..5768:IncFII(Yp)_1__CP000670:94.801595	IncFII(Yp)	CP000670	99.13
Kp7643	rectal	11	NODE_61_length_6613_cov_72.718625:3528..3675:IncFII(K)_1__CP000648:95.270270	IncFII(K)	CP000648	100
Kp7643	rectal	11	NODE_80_length_3054_cov_514.292791:1347..1477:Col(pHAD28)_1__KU674895:94.656489	Col(pHAD28)	KU674895	100
Kp7643	rectal	11	NODE_65_length_4936_cov_224.689333:3250..3380:Col(pHAD28)_1__KU674895:92.366412	Col(pHAD28)	KU674895	100
Kp7643	rectal	11	NODE_76_length_3430_cov_325.646079:1192..1322:Col(pHAD28)_1__KU674895:91.603053	Col(pHAD28)	KU674895	100
Kp7914	rectal	11	-	None	-	-
Kp8059	rectal	11	-	None	-	-
Kp7895	rectal	12	NODE_32_length_9437_cov_37.063695:5658..6217:IncFIB(K)(pCAV1099-114)_1__CP011596:99.642857	IncFIB(K)(pCAV1099-114)	CP011596	100
Kp7895	rectal	12	NODE_19_length_43524_cov_66.534553:26895..27145:IncR_1__DQ449578:99.203187	IncR	DQ449578	100
Kp8047	rectal	12	NODE_12_length_109973_cov_54.432624:54007..54566:IncFIB(pKPHS1)_1__CP003223:98.392857	IncFIB(pKPHS1)	CP003223	100
Kp8047	rectal	12	NODE_20_length_32833_cov_70.355592:14236..14623:IncFIA(HI1)_1__AF250878:96.649485	IncFIA(HI1)	AF250878	100
Kp8047	rectal	12	NODE_27_length_5392_cov_69.864577:2619..2846:IncFII(pKP91)_1__CP000966:94.816784	IncFII(pKP91)	CP000966	98.7
Kp8047	rectal	12	NODE_28_length_4970_cov_198.445385:1283..1398:Col(pHAD28)_1__KU674895:82.442748	Col(pHAD28)	KU674895	88.55
Kp8207	rectal	12	NODE_11_length_195151_cov_36.637245:101546..102115:IncHI1B(pNDM-MAR)_1__JN420336:100.000000	IncHI1B(pNDM-MAR)	JN420336	100
Kp8207	rectal	12	NODE_11_length_195151_cov_36.637245:12209..12647:IncFIB(pNDM-Mar)_1__JN420336:100.000000	IncFIB(pNDM-Mar)	JN420336	100
Kp8207	rectal	12	NODE_13_length_96692_cov_66.386144:48269..48496:IncFII(pKP91)_1__CP000966:94.816784	IncFII(pKP91)	CP000966	98.7
Kp8207	rectal	12	NODE_22_length_3335_cov_203.500623:1923..2053:Col(pHAD28)_1__KU674895:90.839695	Col(pHAD28)	KU674895	100
Kp7980	rectal	13	-	None	-	-
Kp8293	rectal	13	NODE_32_length_14794_cov_41.200927:4882..5132:IncR_1__DQ449578:100.000000	IncR	DQ449578	100
Kp8293	rectal	13	NODE_35_length_9991_cov_25.510036:6351..6910:IncFIB(K)_1__JN233704:98.928571	IncFIB(K)	JN233704	100
Kp8293	rectal	13	NODE_43_length_5882_cov_43.118332:3831..3978:IncFII(K)_1__CP000648:97.297297	IncFII(K)	CP000648	100
Kp8293	rectal	13	NODE_37_length_8781_cov_25.348856:8049..8277:IncFII(pKP91)_1__CP000966:92.230871	IncFII(pKP91)	CP000966	98.7
Kp8293	rectal	13	NODE_46_length_4920_cov_154.249322:4129..4244:Col(pHAD28)_1__KU674895:82.442748	Col(pHAD28)	KU674895	88.55
Kp8335	rectal	13	-	None	-	-
Kp8544	rectal	14	NODE_24_length_57765_cov_32.205090:27993..28409:IncC_1__JN157804:100.000000	IncC	JN157804	100
Kp8544	rectal	14	NODE_27_length_34916_cov_30.628388:5230..5789:IncFIB(K)_1__JN233704:98.928571	IncFIB(K)	JN233704	100
Kp8544	rectal	14	NODE_41_length_5392_cov_195.462108:5180..5293:Col440I_1__CP023920:94.736842	Col440I	CP023920	100
Kp8946	rectal	14	NODE_12_length_78501_cov_32.835073:65283..65842:IncFIB(K)_1__JN233704:98.928571	IncFIB(K)	JN233704	100
Kp8946	rectal	14	NODE_12_length_78501_cov_32.835073:1781..1928:IncFII(K)_1__CP000648:95.945946	IncFII(K)	CP000648	100
Kp9063	rectal	14	NODE_30_length_51199_cov_34.708607:3536..4112:IncFII(pKPX1)_1__AP012055:100.000000	IncFII(pKPX1)	AP012055	100
Kp9063	rectal	14	NODE_78_length_2043_cov_343.149269:1088..1218:Col(pHAD28)_1__KU674895:100.000000	Col(pHAD28)	KU674895	100
Kp9063	rectal	14	NODE_52_length_16450_cov_29.587760:6826..6973:IncFII(K)_1__CP000648:99.324324	IncFII(K)	CP000648	100
Kp9063	rectal	14	NODE_58_length_9748_cov_28.758029:7131..7690:IncFIB(K)_1__JN233704:98.928571	IncFIB(K)	JN233704	100
Kp9063	rectal	14	NODE_62_length_6687_cov_63.054268:2189..2415:FII(pBK30683)_1__KF954760:96.916300	FII(pBK30683)	KF954760	100
Kp6966	rectal	15	NODE_31_length_11771_cov_45.684301:7014..7573:IncFIB(K)_1__JN233704:98.928571	IncFIB(K)	JN233704	100
Kp6966	rectal	15	NODE_21_length_79736_cov_72.412240:41821..41968:IncFII(K)_1__CP000648:98.648649	IncFII(K)	CP000648	100
Kp7031	rectal	15	-	None	-	-
Kp6149	rectal	16	-	None	-	-
Kp6313	rectal	16	NODE_29_length_23637_cov_34.115100:9292..9851:IncFIB(K)_1__JN233704:98.750000	IncFIB(K)	JN233704	100
Kp6313	rectal	16	NODE_30_length_22631_cov_55.761687:2620..2847:IncFII(pKP91)_1__CP000966:94.816784	IncFII(pKP91)	CP000966	98.7
Kp6567	rectal	16	NODE_138_length_8567_cov_24.494923:869..1438:IncHI1B(pNDM-MAR)_1__JN420336:100.000000	IncHI1B(pNDM-MAR)	JN420336	100
Kp6567	rectal	16	NODE_19_length_78192_cov_30.603821:12484..13043:IncFIB(K)_1__JN233704:98.928571	IncFIB(K)	JN233704	100
Kp6567	rectal	16	NODE_19_length_78192_cov_30.603821:76454..76601:IncFII(K)_1__CP000648:95.945946	IncFII(K)	CP000648	100
Kp5117	rectal	17	NODE_11_length_115091_cov_42.438085:11221..11608:IncFIA(HI1)_1__AF250878:97.164948	IncFIA(HI1)	AF250878	100
Kp5117	rectal	17	NODE_15_length_67044_cov_30.637895:17223..17782:IncFIB(K)(pCAV1099-114)_1__CP011596:96.071429	IncFIB(K)(pCAV1099-114)	CP011596	100
Kp5117	rectal	17	NODE_11_length_115091_cov_42.438085:71583..71811:IncFII(pKP91)_1__CP000966:92.230871	IncFII(pKP91)	CP000966	98.7
Kp5215	rectal	17	NODE_72_length_4757_cov_42.854860:310..748:IncFIB(pNDM-Mar)_1__JN420336:100.000000	IncFIB(pNDM-Mar)	JN420336	100
Kp5215	rectal	17	NODE_59_length_9913_cov_37.865113:2340..2899:IncFIB(K)_1__JN233704:98.928571	IncFIB(K)	JN233704	100
Kp5215	rectal	17	NODE_35_length_45183_cov_39.443604:25988..26135:IncFII(K)_1__CP000648:97.972973	IncFII(K)	CP000648	100
Kp5215	rectal	17	NODE_69_length_5872_cov_197.936118:618..731:Col440I_1__CP023920:94.736842	Col440I	CP023920	100
Kp5215	rectal	17	NODE_71_length_4912_cov_224.398746:573..703:Col(pHAD28)_1__KU674895:92.366412	Col(pHAD28)	KU674895	100
Kp5215	rectal	17	NODE_76_length_4041_cov_297.540623:1700..1830:Col(pHAD28)_1__KU674895:91.603053	Col(pHAD28)	KU674895	100
Kp5415	rectal	17	-	None	-	-
Kp3094	rectal	18	NODE_14_length_111226_cov_46.281425:47100..47659:IncFIB(pKPHS1)_1__CP003223:99.821429	IncFIB(pKPHS1)	CP003223	100
Kp3094	rectal	18	NODE_20_length_52497_cov_61.890911:8934..9493:IncFIB(K)_1__JN233704:98.928571	IncFIB(K)	JN233704	100
Kp3094	rectal	18	NODE_18_length_66684_cov_61.936476:48026..48253:IncFII(pKP91)_1__CP000966:94.816784	IncFII(pKP91)	CP000966	98.7
Kp3260	rectal	18	NODE_38_length_13266_cov_52.958749:5407..5657:IncR_1__DQ449578:100.000000	IncR	DQ449578	100
Kp3260	rectal	18	NODE_34_length_19860_cov_33.204632:13644..14203:IncFIB(K)(pCAV1099-114)_1__CP011596:99.642857	IncFIB(K)(pCAV1099-114)	CP011596	100
Kp3260	rectal	18	NODE_36_length_17361_cov_53.473425:13573..13720:IncFII(K)_1__CP000648:97.297297	IncFII(K)	CP000648	100
Kp3260	rectal	18	NODE_43_length_7065_cov_153.849668:4321..4434:Col440I_1__CP023920:95.614035	Col440I	CP023920	100
Kp3455	rectal	18	NODE_33_length_41591_cov_56.324836:26378..26525:IncFII(K)_1__CP000648:100.000000	IncFII(K)	CP000648	100
Kp3455	rectal	18	NODE_36_length_22013_cov_55.966874:13460..14019:IncFIB(K)_1__JN233704:100.000000	IncFIB(K)	JN233704	100
Kp3455	rectal	18	NODE_19_length_111469_cov_52.876399:34161..34720:IncFIB(pKPHS1)_1__CP003223:99.642857	IncFIB(pKPHS1)	CP003223	100
Kp5844	rectal	19	NODE_14_length_59138_cov_53.094271:57142..57718:IncFII(pKPX1)_1__AP012055:100.000000	IncFII(pKPX1)	AP012055	100
Kp5844	rectal	19	NODE_23_length_8724_cov_54.644992:620..870:IncR_1__DQ449578:99.601594	IncR	DQ449578	100
Kp5844	rectal	19	NODE_28_length_4821_cov_173.281423:3145..3275:Col(pHAD28)_1__KU674895:92.366412	Col(pHAD28)	KU674895	100
Kp6181	rectal	19	NODE_18_length_56983_cov_44.055210:42964..43214:IncR_1__DQ449578:100.000000	IncR	DQ449578	100
Kp6181	rectal	19	NODE_21_length_28757_cov_32.766539:21573..22132:IncFIB(K)_1__JN233704:99.107143	IncFIB(K)	JN233704	100
Kp6181	rectal	19	NODE_11_length_111529_cov_32.284896:66976..67535:IncFIB(pKPHS1)_1__CP003223:95.357143	IncFIB(pKPHS1)	CP003223	100
Kp6593	rectal	19	NODE_7_length_157578_cov_42.839963:140593..141152:IncFIB(K)_1__JN233704:99.107143	IncFIB(K)	JN233704	100
Kp6593	rectal	19	NODE_18_length_3433_cov_177.435874:2232..2362:Col(pHAD28)_1__KU674895:91.603053	Col(pHAD28)	KU674895	100
Kp4433	rectal	20	-	None	-	-
Kp4667	rectal	20	-	None	-	-
Kp4702	rectal	20	-	None	-	-
Kp5994	rectal	21	NODE_37_length_13016_cov_49.311894:8254..8813:IncFIB(K)_1__JN233704:100.000000	IncFIB(K)	JN233704	100
Kp5994	rectal	21	NODE_25_length_35620_cov_51.903164:17910..18160:IncR_1__DQ449578:99.203187	IncR	DQ449578	100
Kp5994	rectal	21	NODE_51_length_3862_cov_352.429719:1892..2005:Col440I_1__CP023920:95.614035	Col440I	CP023920	100
Kp5994	rectal	21	NODE_44_length_6543_cov_105.211502:4982..5094:Col440I_1__CP023920:93.905817	Col440I	CP023920	99.12
Kp5994	rectal	21	NODE_50_length_4067_cov_278.700508:535..1398:pKPC-CAV1320_1__CP011573:92.049707	pKPC-CAV1320	CP011573	99.77
Kp5994	rectal	21	NODE_49_length_4220_cov_158.795993:2451..2563:Col440I_1__CP023920:91.297322	Col440I	CP023920	99.12
Kp6131	rectal	21	NODE_17_length_5336_cov_320.808792:4444..4725:Col440II_1__CP023921:100.000000	Col440II	CP023921	100
Kp6131	rectal	21	NODE_10_length_149991_cov_60.413955:15218..15777:IncFIB(K)_1__JN233704:99.642857	IncFIB(K)	JN233704	100
Kp6131	rectal	21	NODE_18_length_4949_cov_310.219204:4054..4335:Col440II_1__CP023921:98.936170	Col440II	CP023921	100
Kp6131	rectal	21	NODE_20_length_3801_cov_222.241971:574..683:Col440I_1__CP023920:91.228070	Col440I	CP023920	96.49
Kp6131	rectal	21	NODE_17_length_5336_cov_320.808792:51..181:Col(pHAD28)_1__KU674895:92.366412	Col(pHAD28)	KU674895	100
Kp6131	rectal	21	NODE_19_length_4336_cov_249.549537:4146..4275:Col(pHAD28)_1__KU674895:91.661325	Col(pHAD28)	KU674895	99.24
Kp6131	rectal	21	NODE_18_length_4949_cov_310.219204:51..181:Col(pHAD28)_1__KU674895:91.603053	Col(pHAD28)	KU674895	100
Kp6168	rectal	21	-	None	-	-
Kp4505	rectal	22	-	None	-	-
Kp4760	rectal	22	NODE_10_length_121734_cov_19.036602:28155..28302:IncFII(K)_1__CP000648:100.000000	IncFII(K)	CP000648	100
Kp4760	rectal	22	NODE_13_length_53367_cov_18.554489:34095..34654:IncFIB(K)_1__JN233704:99.464286	IncFIB(K)	JN233704	100
Kp5053	rectal	22	NODE_33_length_18412_cov_22.788843:10019..10578:IncFIB(K)(pCAV1099-114)_1__CP011596:99.642857	IncFIB(K)(pCAV1099-114)	CP011596	100
Kp5053	rectal	22	NODE_22_length_67139_cov_48.225945:61372..61599:IncFII(Yp)_1__CP000670:94.801595	IncFII(Yp)	CP000670	99.13
Kp5053	rectal	22	NODE_38_length_5891_cov_118.937196:4031..4144:Col440I_1__CP023920:94.736842	Col440I	CP023920	100
Kp5053	rectal	22	NODE_46_length_3101_cov_156.328178:1828..1958:Col(pHAD28)_1__KU674895:93.129771	Col(pHAD28)	KU674895	100
Kp8554	rectal	23	NODE_35_length_22786_cov_40.486959:6931..7490:IncFIB(K)_1__JN233704:98.928571	IncFIB(K)	JN233704	100
Kp8554	rectal	23	NODE_25_length_53819_cov_60.823773:18964..19111:IncFII(K)_1__CP000648:94.594595	IncFII(K)	CP000648	100
Kp8554	rectal	23	NODE_46_length_4867_cov_267.340928:561..841:Col440II_1__CP023921:90.425532	Col440II	CP023921	99.65
Kp8587	rectal	23	NODE_20_length_16274_cov_39.632316:6583..7142:IncFIB(K)_1__JN233704:98.928571	IncFIB(K)	JN233704	100
Kp8587	rectal	23	NODE_29_length_3801_cov_227.171475:3246..3355:Col440I_1__CP023920:91.228070	Col440I	CP023920	96.49
Kp9085	rectal	23	-	None	-	-
Kp6383	rectal	24	-	None	-	-
Kp7772	rectal	25	NODE_14_length_70764_cov_31.520846:5534..6093:IncFIB(K)(pCAV1099-114)_1__CP011596:99.821429	IncFIB(K)(pCAV1099-114)	CP011596	100
Kp7772	rectal	25	NODE_13_length_81450_cov_62.612299:75524..75750:FII(pBK30683)_1__KF954760:92.070485	FII(pBK30683)	KF954760	100
Kp7965	rectal	25	NODE_11_length_66192_cov_29.048589:8875..9434:IncFIB(K)_1__JN233704:98.928571	IncFIB(K)	JN233704	100
Kp7965	rectal	25	NODE_11_length_66192_cov_29.048589:64905..65133:IncFII(pKP91)_1__CP000966:92.661857	IncFII(pKP91)	CP000966	98.7
Kp7965	rectal	25	NODE_17_length_4821_cov_78.513208:1420..1550:Col(pHAD28)_1__KU674895:92.366412	Col(pHAD28)	KU674895	100
Kp8142	rectal	25	-	None	-	-
Kp3604	rectal	26	NODE_14_length_119204_cov_33.636832:7261..7820:IncFIB(K)_1__JN233704:98.928571	IncFIB(K)	JN233704	100
Kp3604	rectal	26	NODE_34_length_4830_cov_259.761854:797..927:Col(pHAD28)_1__KU674895:93.129771	Col(pHAD28)	KU674895	100
Kp3747	rectal	26	NODE_53_length_8439_cov_30.291987:5512..5741:IncFII(pKP91)_1__CP000966:100.000000	IncFII(pKP91)	CP000966	100
Kp3747	rectal	26	NODE_87_length_2043_cov_147.436848:1710..1840:Col(pHAD28)_1__KU674895:100.000000	Col(pHAD28)	KU674895	100
Kp3747	rectal	26	NODE_62_length_6833_cov_30.463615:4410..4557:IncFII(K)_1__CP000648:99.324324	IncFII(K)	CP000648	100
Kp3747	rectal	26	NODE_38_length_25305_cov_27.994003:9009..9259:IncR_1__DQ449578:99.203187	IncR	DQ449578	100
Kp3747	rectal	26	NODE_52_length_9236_cov_24.453398:2338..2897:IncFIB(K)_1__JN233704:98.928571	IncFIB(K)	JN233704	100
Kp3747	rectal	26	NODE_72_length_4382_cov_89.576028:4046..4155:Col440I_1__CP023920:92.105263	Col440I	CP023920	96.49
Kp3747	rectal	26	NODE_144_length_479_cov_86.460227:61..191:Col(pHAD28)_1__KU674895:93.129771	Col(pHAD28)	KU674895	100
Kp3747	rectal	26	NODE_32_length_34450_cov_40.884829:27572..27798:FII(pBK30683)_1__KF954760:91.629956	FII(pBK30683)	KF954760	100
Kp3852	rectal	26	NODE_14_length_78726_cov_31.122126:12971..13530:IncFIB(K)_1__JN233704:98.928571	IncFIB(K)	JN233704	100
Kp3852	rectal	26	NODE_14_length_78726_cov_31.122126:76799..76946:IncFII(K)_1__CP000648:95.945946	IncFII(K)	CP000648	100
Kp3852	rectal	26	NODE_25_length_4057_cov_198.994656:1607..1734:Col(pHAD28)_1__KU674895:89.378070	Col(pHAD28)	KU674895	97.71
Kp9354	rectal	202	-	None	-	-
Kp9386	rectal	202	NODE_41_length_15024_cov_28.855541:8455..9014:IncFIB(K)_1__JN233704:98.928571	IncFIB(K)	JN233704	100
Kp9386	rectal	202	NODE_35_length_25336_cov_32.729779:6141..6288:IncFII(K)_1__CP000648:97.297297	IncFII(K)	CP000648	100
Kp9386	rectal	202	NODE_37_length_23243_cov_32.366932:17495..17882:IncFIA(HI1)_1__AF250878:96.391753	IncFIA(HI1)	AF250878	100
Kp9386	rectal	202	NODE_51_length_5912_cov_331.530510:4046..4155:Col440I_1__CP023920:92.105263	Col440I	CP023920	96.49
Kp9386	rectal	202	NODE_79_length_607_cov_214.412500:289..419:Col(pHAD28)_1__KU674895:93.129771	Col(pHAD28)	KU674895	100
Kp9689	rectal	202	-	None	-	-
Kp6020	rectal	203	-	None	-	-
Kp6051	rectal	203	NODE_11_length_118202_cov_26.265509:116845..116992:IncFII(K)_1__CP000648:100.000000	IncFII(K)	CP000648	100
Kp6051	rectal	203	NODE_14_length_84425_cov_32.628366:72878..73107:IncFII(pKP91)_1__CP000966:100.000000	IncFII(pKP91)	CP000966	100
Kp6051	rectal	203	NODE_20_length_27700_cov_30.488304:16018..16268:IncR_1__DQ449578:99.203187	IncR	DQ449578	100
Kp6051	rectal	203	NODE_11_length_118202_cov_26.265509:90845..91404:IncFIB(K)_1__JN233704:98.750000	IncFIB(K)	JN233704	100
Kp6421	rectal	203	NODE_41_length_6909_cov_21.436302:3134..3703:IncHI1B(pNDM-MAR)_1__JN420336:99.824561	IncHI1B(pNDM-MAR)	JN420336	100
Kp6421	rectal	203	NODE_40_length_8518_cov_23.218687:7771..8209:IncFIB(pNDM-Mar)_1__JN420336:99.544419	IncFIB(pNDM-Mar)	JN420336	100
Kp6421	rectal	203	NODE_45_length_3463_cov_168.770683:1654..1784:Col(pHAD28)_1__KU674895:93.129771	Col(pHAD28)	KU674895	100
Kp10645	rectal	204	-	None	-	-
Kp10769	rectal	204	NODE_33_length_13295_cov_46.914717:8223..8782:IncFIB(K)_1__JN233704:100.000000	IncFIB(K)	JN233704	100
Kp10769	rectal	204	NODE_34_length_13185_cov_61.551922:7752..8002:IncR_1__DQ449578:100.000000	IncR	DQ449578	100
Kp10769	rectal	204	NODE_38_length_10542_cov_61.323572:4057..4317:IncFII_1__AY458016:100.000000	IncFII	AY458016	100
Kp10769	rectal	204	NODE_41_length_9421_cov_102.589413:6515..6644:ColRNAI_1__DQ298019:100.000000	ColRNAI	DQ298019	100
Kp11169	rectal	204	-	None	-	-
Kp10430	rectal	207	NODE_13_length_80741_cov_23.444079:6806..7365:IncFIB(K)_1__JN233704:98.928571	IncFIB(K)	JN233704	100
Kp10430	rectal	207	NODE_19_length_4385_cov_127.380930:4220..4333:Col440I_1__CP023920:95.614035	Col440I	CP023920	100
Kp10430	rectal	207	NODE_19_length_4385_cov_127.380930:1..114:Col(pHAD28)_1__KU674895:80.916031	Col(pHAD28)	KU674895	87.02
Kp10430	rectal	207	NODE_20_length_4293_cov_138.555689:2260..2390:Col(pHAD28)_1__KU674895:90.076336	Col(pHAD28)	KU674895	100
Kp10918	rectal	207	-	None	-	-
Kp9939	rectal	207	-	None	-	-
Kp5622	rectal	208	NODE_17_length_44969_cov_28.457317:30949..31508:IncFIB(K)_1__JN233704:98.928571	IncFIB(K)	JN233704	100
Kp5622	rectal	208	NODE_13_length_100333_cov_29.244267:57742..57889:IncFII(K)_1__CP000648:98.648649	IncFII(K)	CP000648	100
Kp6079	rectal	208	-	None	-	-
Kp6503	rectal	208	NODE_42_length_17639_cov_41.759251:14603..15162:IncFIB(K)_1__JN233704:98.750000	IncFIB(K)	JN233704	100
Kp6503	rectal	208	NODE_31_length_28532_cov_103.065587:7209..7685:IncN3_1__EF219134:96.436059	IncN3	EF219134	100
Kp6503	rectal	208	NODE_47_length_5810_cov_81.454337:3475..3589:Col(pHAD28)_1__KU674895:81.679389	Col(pHAD28)	KU674895	87.79
Kp6503	rectal	208	NODE_48_length_5502_cov_375.120930:4501..4613:Col440I_1__CP023920:89.473684	Col440I	CP023920	99.12
Kp10201	rectal	209	-	None	-	-
Kp10256	rectal	209	NODE_21_length_18919_cov_47.117710:6583..7142:IncFIB(K)_1__JN233704:98.928571	IncFIB(K)	JN233704	100
Kp10256	rectal	209	NODE_30_length_3814_cov_274.259832:208..338:Col(pHAD28)_1__KU674895:94.656489	Col(pHAD28)	KU674895	100
Kp10262	rectal	209	NODE_40_length_9142_cov_20.289850:6165..6724:IncFIB(K)(pCAV1099-114)_1__CP011596:99.642857	IncFIB(K)(pCAV1099-114)	CP011596	100
Kp10262	rectal	209	NODE_26_length_28614_cov_49.603258:20680..20827:IncFII(K)_1__CP000648:97.972973	IncFII(K)	CP000648	100
Kp10262	rectal	209	NODE_35_length_11452_cov_21.631082:8434..8821:IncFIA(HI1)_1__AF250878:97.164948	IncFIA(HI1)	AF250878	100
Kp10262	rectal	209	NODE_20_length_79320_cov_17.149268:6747..7306:IncFIB(pKPHS1)_1__CP003223:96.607143	IncFIB(pKPHS1)	CP003223	100
Kp10162	rectal	210	NODE_57_length_5590_cov_216.191287:136..289:Col156_1__NC_009781:94.805195	Col156	NC009781	100
Kp10162	rectal	210	NODE_46_length_22802_cov_81.564763:18457..19049:IncFII(pCRY)_1__NC_005814:94.266442	IncFII(pCRY)	NC005814	100
Kp10162	rectal	210	NODE_59_length_4413_cov_247.208819:2653..2754:Col440I_1__CP023920:84.210526	Col440I	CP023920	89.47
Kp10162	rectal	210	NODE_63_length_1679_cov_817.148840:35..296:Col(MG828)_1__NC_008486:93.511450	Col(MG828)	NC008486	100
Kp10592	rectal	210	-	None	-	-
Kp10653	rectal	210	NODE_30_length_24052_cov_31.950010:4204..4763:IncFIB(K)_1__JN233704:98.750000	IncFIB(K)	JN233704	100
Kp10653	rectal	210	NODE_21_length_61733_cov_30.432101:54918..55065:IncFII(K)_1__CP000648:97.972973	IncFII(K)	CP000648	100
Kp10143	rectal	211	-	None	-	-
Kp10436	rectal	211	NODE_19_length_43748_cov_68.719149:6785..7396:pKPC-CAV1193_1__CP013325:99.836601	pKPC-CAV1193	CP013325	100
Kp10436	rectal	211	NODE_20_length_37590_cov_29.383418:4205..4764:IncFIB(K)_1__JN233704:98.928571	IncFIB(K)	JN233704	100
Kp10436	rectal	211	NODE_33_length_4179_cov_331.958786:2904..3185:Col440II_1__CP023921:97.163121	Col440II	CP023921	100
Kp10506	rectal	211	NODE_41_length_9848_cov_29.754449:2159..2718:IncFIB(K)_1__JN233704:98.928571	IncFIB(K)	JN233704	100
Kp10506	rectal	211	NODE_36_length_21492_cov_30.378423:11778..11925:IncFII(K)_1__CP000648:97.972973	IncFII(K)	CP000648	100
Kp10506	rectal	211	NODE_64_length_1417_cov_159.403876:1019..1132:Col440I_1__CP023920:94.736842	Col440I	CP023920	100
Kp10506	rectal	211	NODE_115_length_395_cov_164.817164:269..379:Col440I_1__CP023920:92.105263	Col440I	CP023920	97.37
Kp10506	rectal	211	NODE_45_length_5466_cov_183.418805:2335..2465:Col(pHAD28)_1__KU674895:90.839695	Col(pHAD28)	KU674895	100
Kp4712	rectal	213	NODE_28_length_14416_cov_24.393799:1774..2333:IncFIB(K)_1__JN233704:98.928571	IncFIB(K)	JN233704	100
Kp4712	rectal	213	NODE_15_length_53590_cov_35.537082:37009..37236:IncFII(pKP91)_1__CP000966:94.816784	IncFII(pKP91)	CP000966	98.7
Kp5120	rectal	213	NODE_51_length_11979_cov_26.323321:8989..9558:IncHI1B(pNDM-MAR)_1__JN420336:99.473684	IncHI1B(pNDM-MAR)	JN420336	100
Kp5120	rectal	213	NODE_59_length_8326_cov_24.127089:1654..2092:IncFIB(pNDM-Mar)_1__JN420336:99.316629	IncFIB(pNDM-Mar)	JN420336	100
Kp5120	rectal	213	NODE_50_length_12033_cov_33.635478:8455..9014:IncFIB(K)_1__JN233704:98.928571	IncFIB(K)	JN233704	100
Kp5120	rectal	213	NODE_26_length_65770_cov_33.644029:16444..16591:IncFII(K)_1__CP000648:97.297297	IncFII(K)	CP000648	100
Kp5120	rectal	213	NODE_40_length_23240_cov_37.088738:17496..17883:IncFIA(HI1)_1__AF250878:96.391753	IncFIA(HI1)	AF250878	100
Kp5120	rectal	213	NODE_85_length_2634_cov_135.453131:986..1099:Col440I_1__CP023920:95.614035	Col440I	CP023920	100
Kp5120	rectal	213	NODE_68_length_5967_cov_100.609247:246..359:Col440I_1__CP023920:94.736842	Col440I	CP023920	100
Kp5120	rectal	213	NODE_69_length_5923_cov_104.292443:5732..5862:Col(pHAD28)_1__KU674895:94.656489	Col(pHAD28)	KU674895	100
Kp5120	rectal	213	NODE_73_length_5245_cov_202.419109:62..192:Col(pHAD28)_1__KU674895:93.129771	Col(pHAD28)	KU674895	100
Kp5120	rectal	213	NODE_73_length_5245_cov_202.419109:4420..4700:Col440II_1__CP023921:90.425532	Col440II	CP023921	99.65
Kp5581	rectal	213	-	None	-	-
Kp3567	rectal	214	NODE_13_length_110527_cov_32.245172:63219..63778:IncFIB(pKPHS1)_1__CP003223:95.535714	IncFIB(pKPHS1)	CP003223	100
Kp3567	rectal	214	NODE_19_length_3801_cov_160.069951:247..356:Col440I_1__CP023920:91.228070	Col440I	CP023920	96.49
Kp3567	rectal	214	NODE_20_length_3641_cov_350.135743:2199..2329:Col(pHAD28)_1__KU674895:93.129771	Col(pHAD28)	KU674895	100
Kp3567	rectal	214	NODE_20_length_3641_cov_350.135743:1338..1618:Col440II_1__CP023921:90.425532	Col440II	CP023921	99.65
Kp3874	rectal	214	NODE_20_length_17196_cov_35.299666:14751..15310:IncFIB(K)_1__JN233704:100.000000	IncFIB(K)	JN233704	100
Kp3874	rectal	214	NODE_15_length_37496_cov_40.849180:19593..19843:IncR_1__DQ449578:99.203187	IncR	DQ449578	100
Kp3874	rectal	214	NODE_14_length_46054_cov_35.326279:43941..44088:IncFII(K)_1__CP000648:97.972973	IncFII(K)	CP000648	100
Kp3874	rectal	214	NODE_26_length_4388_cov_118.232575:3924..4053:Col(pHAD28)_1__KU674895:92.418857	Col(pHAD28)	KU674895	99.24
Kp3996	rectal	214	NODE_15_length_62146_cov_33.328819:23791..24350:IncFIB(K)_1__JN233704:99.464286	IncFIB(K)	JN233704	100
Kp3996	rectal	214	NODE_25_length_8195_cov_54.651587:4961..5108:IncFII(K)_1__CP000648:95.270270	IncFII(K)	CP000648	100
Kp3996	rectal	214	NODE_32_length_3823_cov_102.032468:1468..1598:Col(pHAD28)_1__KU674895:94.656489	Col(pHAD28)	KU674895	100
Kp7994	rectal	215	-	None	-	-
Kp8125	rectal	215	NODE_12_length_160001_cov_29.543991:21031..21590:IncFIB(K)_1__JN233704:98.928571	IncFIB(K)	JN233704	100
Kp8125	rectal	215	NODE_12_length_160001_cov_29.543991:127448..127595:IncFII(K)_1__CP000648:97.972973	IncFII(K)	CP000648	100
Kp8125	rectal	215	NODE_28_length_3676_cov_265.552832:2083..2213:Col(pHAD28)_1__KU674895:93.129771	Col(pHAD28)	KU674895	100
Kp8125	rectal	215	NODE_24_length_5061_cov_156.028375:4430..4560:Col(pHAD28)_1__KU674895:92.366412	Col(pHAD28)	KU674895	100
Kp8125	rectal	215	NODE_30_length_3341_cov_101.902614:913..1043:Col(pHAD28)_1__KU674895:90.076336	Col(pHAD28)	KU674895	100
Kp8184	rectal	215	-	None	-	-
Kp4677	rectal	216	NODE_12_length_170316_cov_20.844038:166229..166788:repB_KLEB_VIR_AP006726:99.821429	repB	AP006726	100
Kp4677	rectal	216	NODE_12_length_170316_cov_20.844038:150808..151377:IncHI1B(pNDM-MAR)_1__JN420336:99.122807	IncHI1B(pNDM-MAR)	JN420336	100
Kp4929	rectal	216	NODE_25_length_75462_cov_51.846592:33541..33791:IncR_1__DQ449578:100.000000	IncR	DQ449578	100
Kp4929	rectal	216	NODE_32_length_31613_cov_32.946484:6880..7439:IncFIB(K)_1__JN233704:98.928571	IncFIB(K)	JN233704	100
Kp4929	rectal	216	NODE_25_length_75462_cov_51.846592:13320..13467:IncFII(K)_1__CP000648:97.297297	IncFII(K)	CP000648	100
Kp4929	rectal	216	NODE_48_length_4207_cov_123.531618:100..213:Col440I_1__CP023920:92.982456	Col440I	CP023920	100
Kp5014	rectal	216	NODE_21_length_72631_cov_44.072658:67546..68105:IncFIB(K)_1__JN233704:98.928571	IncFIB(K)	JN233704	100
Kp5014	rectal	216	NODE_21_length_72631_cov_44.072658:3643..3790:IncFII(K)_1__CP000648:98.648649	IncFII(K)	CP000648	100
Kp10237	rectal	217	NODE_7_length_142246_cov_46.821248:138125..138684:IncFIB(K)(pCAV1099-114)_1__CP011596:96.071429	IncFIB(K)(pCAV1099-114)	CP011596	100
Kp10237	rectal	217	NODE_8_length_110626_cov_43.277577:68086..68645:IncFIB(pKPHS1)_1__CP003223:96.071429	IncFIB(pKPHS1)	CP003223	100
Kp10237	rectal	217	NODE_12_length_4466_cov_185.689790:2764..2877:Col440I_1__CP023920:95.614035	Col440I	CP023920	100
Kp9801	rectal	217	NODE_45_length_12266_cov_27.866052:4178..4737:IncFIB(K)(pCAV1099-114)_1__CP011596:96.250000	IncFIB(K)(pCAV1099-114)	CP011596	100
Kp9801	rectal	217	NODE_53_length_8154_cov_137.578298:5840..5954:Col(pHAD28)_1__KU674895:81.679389	Col(pHAD28)	KU674895	87.79
Kp9884	rectal	217	NODE_22_length_15205_cov_62.128731:7100..7350:IncR_1__DQ449578:99.601594	IncR	DQ449578	100
Kp9884	rectal	217	NODE_23_length_12558_cov_71.374708:11074..11460:IncFIA(HI1)_1__AF250878:98.195876	IncFIA(HI1)	AF250878	99.74
Kp9884	rectal	217	NODE_13_length_111215_cov_42.039014:110624..111183:IncFIB(pKPHS1)_1__CP003223:95.714286	IncFIB(pKPHS1)	CP003223	100
Kp8836	rectal	218	-	None	-	-
Kp8937	rectal	218	NODE_14_length_5766_cov_95.421351:3965..4079:Col440I_1__CP023920:97.391304	Col440I	CP023920	100
Kp8937	rectal	218	NODE_15_length_4920_cov_123.187148:3155..3285:Col(pHAD28)_1__KU674895:92.366412	Col(pHAD28)	KU674895	100
Kp9243	rectal	218	NODE_36_length_15685_cov_78.510541:2698..2924:FII(pBK30683)_1__KF954760:100.000000	FII(pBK30683)	KF954760	100
Kp9243	rectal	218	NODE_31_length_23784_cov_40.279368:19236..19795:IncFIB(K)(pCAV1099-114)_1__CP011596:99.642857	IncFIB(K)(pCAV1099-114)	CP011596	100
Kp9243	rectal	218	NODE_46_length_7912_cov_59.226076:5123..5270:IncFII(K)_1__CP000648:95.945946	IncFII(K)	CP000648	100
Kp9243	rectal	218	NODE_33_length_22120_cov_80.247533:19602..19829:IncFII(Yp)_1__CP000670:94.801595	IncFII(Yp)	CP000670	99.13
Kp9243	rectal	218	NODE_32_length_23120_cov_52.179272:8460..8754:FIA(pBK30683)_1__KF954760:94.915254	FIA(pBK30683)	KF954760	100
Kp9243	rectal	218	NODE_48_length_7423_cov_166.639391:628..743:Col(pHAD28)_1__KU674895:83.206107	Col(pHAD28)	KU674895	88.55
Kp9243	rectal	218	NODE_34_length_17456_cov_59.410526:15019..15245:IncFII(Yp)_1__CP000670:90.937915	IncFII(Yp)	CP000670	98.7
Kp11034	rectal	301	NODE_17_length_75243_cov_42.572568:53770..54329:IncFIB(K)_1__JN233704:98.928571	IncFIB(K)	JN233704	100
Kp11034	rectal	301	NODE_22_length_4290_cov_212.630795:1462..1575:Col440I_1__CP023920:96.491228	Col440I	CP023920	100
Kp11667	rectal	301	NODE_27_length_44776_cov_72.491478:23569..24308:IncFIB(pQil)_1__JN233705:100.000000	IncFIB(pQil)	JN233705	100
Kp11667	rectal	301	NODE_36_length_17778_cov_55.380545:4204..4763:IncFIB(K)_1__JN233704:98.750000	IncFIB(K)	JN233704	100
Kp11667	rectal	301	NODE_33_length_24322_cov_52.054185:17614..17761:IncFII(K)_1__CP000648:97.972973	IncFII(K)	CP000648	100
Kp11667	rectal	301	NODE_51_length_2679_cov_469.607367:1451..1564:Col440I_1__CP023920:95.614035	Col440I	CP023920	100
Kp9823	rectal	301	NODE_16_length_50431_cov_34.981870:4775..4968:IncFII(pKP91)_1__CP000966:84.347826	IncFII(pKP91)	CP000966	84.35
Kp9823	rectal	301	NODE_14_length_80676_cov_35.221430:36089..36383:FIA(pBK30683)_1__KF954760:97.288136	FIA(pBK30683)	KF954760	100
Kp10838	rectal	302	NODE_15_length_62355_cov_35.344909:7045..7604:IncFIB(K)_1__JN233704:98.928571	IncFIB(K)	JN233704	100
Kp10838	rectal	302	NODE_23_length_24058_cov_33.671723:16698..16845:IncFII(K)_1__CP000648:97.972973	IncFII(K)	CP000648	100
Kp10838	rectal	302	NODE_29_length_4544_cov_229.706135:515..628:Col440I_1__CP023920:95.614035	Col440I	CP023920	100
Kp10838	rectal	302	NODE_31_length_3898_cov_224.664015:510..623:Col440I_1__CP023920:93.859649	Col440I	CP023920	100
Kp10838	rectal	302	NODE_28_length_4858_cov_273.931727:71..351:Col440II_1__CP023921:90.425532	Col440II	CP023921	99.65
Kp8982	rectal	302	NODE_38_length_26634_cov_43.510167:5378..5525:IncFII(K)_1__CP000648:99.324324	IncFII(K)	CP000648	100
Kp8982	rectal	302	NODE_49_length_9841_cov_40.738213:7131..7690:IncFIB(K)_1__JN233704:98.928571	IncFIB(K)	JN233704	100
Kp8982	rectal	302	NODE_32_length_49141_cov_41.791549:43039..43186:IncFII(K)_1__CP000648:97.972973	IncFII(K)	CP000648	100
Kp8982	rectal	302	NODE_42_length_21379_cov_40.471344:5401..5695:FIA(pBK30683)_1__KF954760:96.949153	FIA(pBK30683)	KF954760	100
Kp8982	rectal	302	NODE_56_length_6783_cov_203.909555:6030..6160:Col(pHAD28)_1__KU674895:93.129771	Col(pHAD28)	KU674895	100
Kp8982	rectal	302	NODE_46_length_15331_cov_146.916996:2230..2360:Col(pHAD28)_1__KU674895:92.366412	Col(pHAD28)	KU674895	100
Kp8982	rectal	302	NODE_63_length_2046_cov_238.373632:74..204:Col(pHAD28)_1__KU674895:90.215128	Col(pHAD28)	KU674895	99.24
Kp9247	rectal	302	NODE_10_length_144409_cov_34.362533:55726..55873:IncFII(K)_1__CP000648:100.000000	IncFII(K)	CP000648	100
Kp9247	rectal	302	NODE_17_length_13334_cov_66.863103:4254..4504:IncR_1__DQ449578:100.000000	IncR	DQ449578	100
Kp9247	rectal	302	NODE_10_length_144409_cov_34.362533:139909..140468:IncFIB(K)_1__JN233704:98.928571	IncFIB(K)	JN233704	100
Kp11436	rectal	303	-	None	-	-
Kp9731	rectal	303	-	None	-	-
Kp9828	rectal	303	NODE_43_length_23525_cov_68.008462:4415..4562:IncFII(K)_1__CP000648:99.324324	IncFII(K)	CP000648	100
Kp9828	rectal	303	NODE_60_length_8180_cov_57.897305:6827..7077:IncR_1__DQ449578:99.203187	IncR	DQ449578	100
Kp9828	rectal	303	NODE_55_length_9324_cov_60.142220:7012..7571:IncFIB(K)_1__JN233704:98.928571	IncFIB(K)	JN233704	100
Kp9828	rectal	303	NODE_62_length_5912_cov_484.145722:1469..1578:Col440I_1__CP023920:92.105263	Col440I	CP023920	96.49
Kp9828	rectal	303	NODE_65_length_4931_cov_309.098251:3250..3380:Col(pHAD28)_1__KU674895:92.366412	Col(pHAD28)	KU674895	100
Kp10543	rectal	304	NODE_7_length_108852_cov_37.178717:103065..103624:IncFIB(pKPHS1)_1__CP003223:97.678571	IncFIB(pKPHS1)	CP003223	100
Kp10543	rectal	304	NODE_10_length_76414_cov_48.489074:11221..11608:IncFIA(HI1)_1__AF250878:97.164948	IncFIA(HI1)	AF250878	100
Kp10543	rectal	304	NODE_13_length_49552_cov_32.906768:31772..32331:IncFIB(K)(pCAV1099-114)_1__CP011596:96.071429	IncFIB(K)(pCAV1099-114)	CP011596	100
Kp10543	rectal	304	NODE_10_length_76414_cov_48.489074:32906..33134:IncFII(pKP91)_1__CP000966:92.230871	IncFII(pKP91)	CP000966	98.7
Kp11262	rectal	304	NODE_14_length_19830_cov_51.005075:4856..5106:IncR_1__DQ449578:100.000000	IncR	DQ449578	100
Kp11262	rectal	304	NODE_16_length_8158_cov_46.169593:5488..5874:IncFIA(HI1)_1__AF250878:98.195876	IncFIA(HI1)	AF250878	99.74
Kp9906	rectal	304	NODE_16_length_5438_cov_191.148371:4992..5272:Col440II_1__CP023921:97.163121	Col440II	CP023921	99.65
Kp9906	rectal	304	NODE_16_length_5438_cov_191.148371:4269..4397:Col(pHAD28)_1__KU674895:91.603053	Col(pHAD28)	KU674895	98.47
Kp10335	rectal	305	NODE_20_length_28266_cov_31.887061:2704..3263:IncFIB(K)_1__JN233704:99.107143	IncFIB(K)	JN233704	100
Kp10335	rectal	305	NODE_21_length_26594_cov_41.329845:24136..24522:IncFIA(HI1)_1__AF250878:98.711340	IncFIA(HI1)	AF250878	99.74
Kp10335	rectal	305	NODE_22_length_21584_cov_33.151373:8933..9163:IncFII(pKP91)_1__CP000966:95.670996	IncFII(pKP91)	CP000966	100
Kp10335	rectal	305	NODE_11_length_110681_cov_28.682888:64898..65457:IncFIB(pKPHS1)_1__CP003223:95.178571	IncFIB(pKPHS1)	CP003223	100
Kp10335	rectal	305	NODE_30_length_6024_cov_214.122605:2539..2669:Col(pHAD28)_1__KU674895:94.656489	Col(pHAD28)	KU674895	100
Kp11288	rectal	305	-	None	-	-
Kp9457	rectal	305	NODE_37_length_9229_cov_45.580092:1124..1374:IncR_1__DQ449578:99.601594	IncR	DQ449578	100
Kp9457	rectal	305	NODE_30_length_16569_cov_32.107529:9299..9858:IncFIB(K)_1__JN233704:98.928571	IncFIB(K)	JN233704	100
Kp9457	rectal	305	NODE_31_length_15253_cov_54.454978:12594..12980:IncFIA(HI1)_1__AF250878:98.195876	IncFIA(HI1)	AF250878	99.74
Kp9457	rectal	305	NODE_16_length_108315_cov_30.224064:73300..73859:IncFIB(pKPHS1)_1__CP003223:95.535714	IncFIB(pKPHS1)	CP003223	100
Kp9457	rectal	305	NODE_21_length_55383_cov_74.797977:51468..52042:IncFII(pKPX1)_1__AP012055:90.641248	IncFII(pKPX1)	AP012055	99.65
Kp8253	rectal	401	-	None	-	-
Kp8526	rectal	401	-	None	-	-
Kp8894	rectal	401	NODE_27_length_2890_cov_33.609482:861..1420:IncFIB(K)(pCAV1099-114)_1__CP011596:99.642857	IncFIB(K)(pCAV1099-114)	CP011596	100
Kp8894	rectal	401	NODE_22_length_30389_cov_35.935067:28279..28573:FIA(pBK30683)_1__KF954760:96.610169	FIA(pBK30683)	KF954760	100
Kp8894	rectal	401	NODE_26_length_4990_cov_79.975118:1833..1946:Col440I_1__CP023920:95.614035	Col440I	CP023920	100
Kp8894	rectal	401	NODE_20_length_35038_cov_27.080535:27496..28055:IncFIB(pKPHS1)_1__CP003223:95.357143	IncFIB(pKPHS1)	CP003223	100
Kp8894	rectal	401	NODE_17_length_72082_cov_33.125092:61810..62038:IncFII(pKP91)_1__CP000966:88.971139	IncFII(pKP91)	CP000966	97.83
Kp10269	rectal	403	NODE_9_length_139935_cov_39.805169:41943..42502:IncFIB(K)_1__JN233704:98.750000	IncFIB(K)	JN233704	100
Kp10269	rectal	403	NODE_9_length_139935_cov_39.805169:104642..104789:IncFII(K)_1__CP000648:96.657900	IncFII(K)	CP000648	99.32
Kp10300	rectal	403	-	None	-	-
Kp10379	rectal	403	-	None	-	-
Kp3675	rectal	404	NODE_48_length_10725_cov_22.376297:3090..3649:IncFIB(K)(pCAV1099-114)_1__CP011596:99.642857	IncFIB(K)(pCAV1099-114)	CP011596	100
Kp3675	rectal	404	NODE_66_length_1709_cov_86.843869:1027..1140:Col440I_1__CP023920:95.614035	Col440I	CP023920	100
Kp3859	rectal	404	NODE_22_length_84602_cov_30.265269:75106..75335:IncFII(pKP91)_1__CP000966:100.000000	IncFII(pKP91)	CP000966	100
Kp3859	rectal	404	NODE_24_length_48065_cov_36.700280:6386..6899:IncN_1__AY046276:99.805447	IncN	AY046276	100
Kp3859	rectal	404	NODE_18_length_103517_cov_30.829365:96443..97002:IncFIB(K)_1__JN233704:98.928571	IncFIB(K)	JN233704	100
Kp3859	rectal	404	NODE_17_length_111713_cov_19.275070:41123..41682:IncFIB(pKPHS1)_1__CP003223:96.250000	IncFIB(pKPHS1)	CP003223	100
Kp4211	rectal	404	NODE_41_length_24222_cov_44.625316:4859..5598:IncFIB(pQil)_1__JN233705:100.000000	IncFIB(pQil)	JN233705	100
Kp4211	rectal	404	NODE_54_length_13783_cov_36.226128:5650..5900:IncR_1__DQ449578:99.601594	IncR	DQ449578	100
Kp4211	rectal	404	NODE_61_length_10230_cov_25.732357:7017..7576:IncFIB(K)_1__JN233704:98.928571	IncFIB(K)	JN233704	100
Kp4211	rectal	404	NODE_59_length_10990_cov_26.280770:8938..9085:IncFII(K)_1__CP000648:97.972973	IncFII(K)	CP000648	100
Kp4211	rectal	404	NODE_72_length_6590_cov_46.372273:3746..3893:IncFII(K)_1__CP000648:95.270270	IncFII(K)	CP000648	100
Kp4211	rectal	404	NODE_91_length_3597_cov_194.310663:624..754:Col(pHAD28)_1__KU674895:93.129771	Col(pHAD28)	KU674895	100
Kp10197	rectal	405	NODE_16_length_69338_cov_30.448628:7608..8167:IncFIB(K)(pCAV1099-114)_1__CP011596:99.821429	IncFIB(K)(pCAV1099-114)	CP011596	100
Kp10197	rectal	405	NODE_31_length_3935_cov_221.426733:1451..1579:Col(pHAD28)_1__KU674895:91.603053	Col(pHAD28)	KU674895	98.47
Kp10372	rectal	405	NODE_10_length_151787_cov_34.816464:100421..100980:repB_KLEB_VIR_AP006726:100.000000	repB	AP006726	100
Kp10372	rectal	405	NODE_10_length_151787_cov_34.816464:81752..82224:IncHI1B(pNDM-MAR)_1__JN420336:82.280702	IncHI1B(pNDM-MAR)	JN420336	82.98
Kp10372	rectal	405	NODE_20_length_38046_cov_116.385021:7936..8449:IncN_1__AY046276:95.330739	IncN	AY046276	100
Kp10372	rectal	405	NODE_14_length_81450_cov_91.603261:66084..66310:FII(pBK30683)_1__KF954760:92.070485	FII(pBK30683)	KF954760	100
Kp10384	rectal	405	-	None	-	-
Kp2979	rectal	406	-	None	-	-
Kp3054	rectal	406	-	None	-	-
Kp3176	rectal	406	-	None	-	-
Kp9030	rectal	407	NODE_17_length_4689_cov_279.798992:2855..2968:Col440I_1__CP023920:95.614035	Col440I	CP023920	100
Kp9030	rectal	407	NODE_9_length_111171_cov_27.884892:6200..6759:IncFIB(pKPHS1)_1__CP003223:95.178571	IncFIB(pKPHS1)	CP003223	100
Kp9164	rectal	407	NODE_21_length_74622_cov_45.553218:71082..71658:IncFII(pKPX1)_1__AP012055:100.000000	IncFII(pKPX1)	AP012055	100
Kp9164	rectal	407	NODE_31_length_18411_cov_28.181908:7835..8394:IncFIB(K)(pCAV1099-114)_1__CP011596:99.642857	IncFIB(K)(pCAV1099-114)	CP011596	100
Kp9164	rectal	407	NODE_53_length_2019_cov_346.637949:662..854:ColpVC_1__JX133088:97.927461	ColpVC	JX133088	100
Kp9164	rectal	407	NODE_45_length_3464_cov_242.381181:2978..3091:Col440I_1__CP023920:96.491228	Col440I	CP023920	100
Kp9235	rectal	407	-	None	-	-
Kp6320	rectal	409	NODE_11_length_201742_cov_29.096005:14073..14220:IncFII(K)_1__CP000648:96.657900	IncFII(K)	CP000648	99.32
Kp6320	rectal	409	NODE_11_length_201742_cov_29.096005:80231..80789:IncFIB(K)(pCAV1099-114)_1__CP011596:95.892857	IncFIB(K)(pCAV1099-114)	CP011596	99.82
Kp6320	rectal	409	NODE_13_length_109623_cov_31.706208:102609..103168:IncFIB(pKPHS1)_1__CP003223:95.535714	IncFIB(pKPHS1)	CP003223	100
Kp6373	rectal	409	NODE_19_length_110798_cov_21.881685:25931..26490:IncFIB(pKPHS1)_1__CP003223:99.821429	IncFIB(pKPHS1)	CP003223	100
Kp6373	rectal	409	NODE_12_length_177065_cov_24.629186:132041..132600:IncFIB(K)_1__JN233704:98.750000	IncFIB(K)	JN233704	100
Kp6690	rectal	409	-	None	-	-
Kp7998	rectal	411	NODE_25_length_23057_cov_80.643393:16298..16811:IncN_1__AY046276:99.221790	IncN	AY046276	100
Kp7998	rectal	411	NODE_28_length_11862_cov_35.217980:2340..2899:IncFIB(K)_1__JN233704:98.928571	IncFIB(K)	JN233704	100
Kp7998	rectal	411	NODE_35_length_6376_cov_51.103217:2835..2982:IncFII(K)_1__CP000648:97.297297	IncFII(K)	CP000648	100
Kp7998	rectal	411	NODE_33_length_7265_cov_190.210563:7081..7211:Col(pHAD28)_1__KU674895:93.129771	Col(pHAD28)	KU674895	100
Kp7998	rectal	411	NODE_33_length_7265_cov_190.210563:3472..3602:Col(pHAD28)_1__KU674895:93.129771	Col(pHAD28)	KU674895	100
Kp8267	rectal	411	-	None	-	-
Kp8374	rectal	411	-	None	-	-
Kp10144	rectal	412	-	None	-	-
Kp10289	rectal	412	NODE_34_length_13296_cov_36.687524:4515..5074:IncFIB(K)_1__JN233704:100.000000	IncFIB(K)	JN233704	100
Kp10289	rectal	412	NODE_39_length_10779_cov_67.978126:5345..5595:IncR_1__DQ449578:100.000000	IncR	DQ449578	100
Kp10289	rectal	412	NODE_40_length_9421_cov_110.014956:6387..6516:ColRNAI_1__DQ298019:100.000000	ColRNAI	DQ298019	100
Kp10289	rectal	412	NODE_31_length_19106_cov_81.779019:7216..7363:IncFII(K)_1__CP000648:97.972973	IncFII(K)	CP000648	100
Kp10521	rectal	412	-	None	-	-
Kp3430	rectal	413	NODE_15_length_81142_cov_43.964278:77571..78309:IncM1_1__U27345:99.458728	IncM1	U27345	100
Kp3430	rectal	413	NODE_23_length_9495_cov_21.641012:1992..2551:IncFIB(K)_1__JN233704:98.928571	IncFIB(K)	JN233704	100
Kp3430	rectal	413	NODE_12_length_118424_cov_19.059215:64651..65210:IncFIB(pKPHS1)_1__CP003223:95.357143	IncFIB(pKPHS1)	CP003223	100
Kp3474	rectal	413	NODE_52_length_11710_cov_32.579297:7009..7568:IncFIB(K)_1__JN233704:98.928571	IncFIB(K)	JN233704	100
Kp3474	rectal	413	NODE_30_length_48233_cov_31.727976:45928..46075:IncFII(K)_1__CP000648:97.297297	IncFII(K)	CP000648	100
Kp3474	rectal	413	NODE_72_length_3457_cov_152.184685:55..185:Col(pHAD28)_1__KU674895:93.129771	Col(pHAD28)	KU674895	100
Kp3474	rectal	413	NODE_68_length_4294_cov_198.815695:55..185:Col(pHAD28)_1__KU674895:92.366412	Col(pHAD28)	KU674895	100
Kp3773	rectal	413	-	None	-	-
Kp4236	rectal	414	NODE_27_length_9385_cov_19.834521:1992..2551:IncFIB(K)_1__JN233704:98.928571	IncFIB(K)	JN233704	100
Kp4236	rectal	414	NODE_13_length_78155_cov_27.096017:13737..14124:IncFIA(HI1)_1__AF250878:96.907216	IncFIA(HI1)	AF250878	100
Kp4289	rectal	414	NODE_8_length_101517_cov_24.406638:75874..76433:IncFIB(K)_1__JN233704:99.107143	IncFIB(K)	JN233704	100
Kp4289	rectal	414	NODE_8_length_101517_cov_24.406638:19963..20191:IncFII(pKP91)_1__CP000966:88.971139	IncFII(pKP91)	CP000966	97.83
Kp4607	rectal	414	NODE_28_length_40934_cov_19.876639:7074..7633:IncFIB(K)(pCAV1099-114)_1__CP011596:99.642857	IncFIB(K)(pCAV1099-114)	CP011596	100
Kp4607	rectal	414	NODE_44_length_7446_cov_42.532177:5043..5270:IncFII(Yp)_1__CP000670:94.801595	IncFII(Yp)	CP000670	99.13
Kp4607	rectal	414	NODE_59_length_3008_cov_190.572371:2544..2674:Col(pHAD28)_1__KU674895:91.603053	Col(pHAD28)	KU674895	100
Kp2837	rectal	415	NODE_12_length_56098_cov_26.982562:46916..47475:IncFIB(K)_1__JN233704:98.750000	IncFIB(K)	JN233704	100
Kp2837	rectal	415	NODE_9_length_103814_cov_27.829283:83579..83726:IncFII(K)_1__CP000648:97.297297	IncFII(K)	CP000648	100
Kp3155	rectal	415	NODE_13_length_166446_cov_27.036574:112114..112673:IncFIB(K)_1__JN233704:98.750000	IncFIB(K)	JN233704	100
Kp3155	rectal	415	NODE_13_length_166446_cov_27.036574:6668..6815:IncFII(K)_1__CP000648:97.972973	IncFII(K)	CP000648	100
Kp3155	rectal	415	NODE_32_length_4113_cov_104.778726:3836..3966:Col(pHAD28)_1__KU674895:96.183206	Col(pHAD28)	KU674895	100
Kp3155	rectal	415	NODE_28_length_5222_cov_156.279490:2230..2360:Col(pHAD28)_1__KU674895:90.839695	Col(pHAD28)	KU674895	100
Kp3197	rectal	415	NODE_6_length_147789_cov_21.716576:63335..63564:IncFII(pKP91)_1__CP000966:100.000000	IncFII(pKP91)	CP000966	100
Kp3197	rectal	415	NODE_6_length_147789_cov_21.716576:3473..4032:IncFIB(K)_1__JN233704:98.928571	IncFIB(K)	JN233704	100
Kp8382	rectal	417	-	None	-	-
Kp8879	rectal	417	-	None	-	-
Kp4753	rectal	418	NODE_9_length_98238_cov_19.347769:85298..85736:IncFIB(pNDM-Mar)_1__JN420336:100.000000	IncFIB(pNDM-Mar)	JN420336	100
Kp4753	rectal	418	NODE_12_length_40464_cov_34.914867:10853..11103:IncR_1__DQ449578:100.000000	IncR	DQ449578	100
Kp4753	rectal	418	NODE_20_length_12273_cov_21.659147:8334..8903:IncHI1B(pNDM-MAR)_1__JN420336:100.000000	IncHI1B(pNDM-MAR)	JN420336	100
Kp4753	rectal	418	NODE_16_length_34957_cov_24.144272:23882..24441:repB_KLEB_VIR_AP006726:99.821429	repB	AP006726	100
Kp4753	rectal	418	NODE_27_length_5952_cov_147.770129:1908..2017:Col440I_1__CP023920:92.105263	Col440I	CP023920	96.49
Kp4956	rectal	418	-	None	-	-
Kp5138	rectal	418	NODE_30_length_21714_cov_24.894798:2314..2752:IncFIB(pNDM-Mar)_1__JN420336:100.000000	IncFIB(pNDM-Mar)	JN420336	100
Kp5138	rectal	418	NODE_31_length_19762_cov_35.841609:13977..14227:IncR_1__DQ449578:100.000000	IncR	DQ449578	100
Kp5138	rectal	418	NODE_26_length_31814_cov_34.977688:4465..4852:IncFIA(HI1)_1__AF250878:97.164948	IncFIA(HI1)	AF250878	100
Kp5138	rectal	418	NODE_22_length_42375_cov_29.548026:1672..1819:IncFII(K)_1__CP000648:94.594595	IncFII(K)	CP000648	100
Kp5138	rectal	418	NODE_153_length_183_cov_452.857143:1..91:Col(pHAD28)_1__KU674895:64.885496	Col(pHAD28)	KU674895	69.47
Kp5138	rectal	418	NODE_48_length_4756_cov_112.297256:2394..2524:Col(pHAD28)_1__KU674895:93.129771	Col(pHAD28)	KU674895	100
Kp5138	rectal	418	NODE_53_length_4435_cov_214.400186:37..151:Col(pHAD28)_1__KU674895:81.679389	Col(pHAD28)	KU674895	87.79
Kp5138	rectal	418	NODE_44_length_5157_cov_262.344930:37..167:Col(pHAD28)_1__KU674895:92.366412	Col(pHAD28)	KU674895	100
Kp5138	rectal	418	NODE_46_length_5049_cov_176.217391:2713..2843:Col(pHAD28)_1__KU674895:91.603053	Col(pHAD28)	KU674895	100
Kp5138	rectal	418	NODE_57_length_3429_cov_213.054512:1450..1580:Col(pHAD28)_1__KU674895:91.603053	Col(pHAD28)	KU674895	100
Kp10743	rectal	501	NODE_10_length_137459_cov_51.319438:42168..42315:IncFII(K)_1__CP000648:100.000000	IncFII(K)	CP000648	100
Kp10743	rectal	501	NODE_10_length_137459_cov_51.319438:99776..100335:IncFIB(K)_1__JN233704:99.107143	IncFIB(K)	JN233704	100
Kp11018	rectal	501	-	None	-	-
Kp11628	rectal	501	-	None	-	-
Kp10480	rectal	502	NODE_20_length_34738_cov_31.539453:28366..28925:IncFIB(K)(pCAV1099-114)_1__CP011596:100.000000	IncFIB(K)(pCAV1099-114)	CP011596	100
Kp10480	rectal	502	NODE_31_length_3637_cov_393.659259:2814..2927:Col440I_1__CP023920:95.614035	Col440I	CP023920	100
Kp10480	rectal	502	NODE_17_length_71550_cov_77.341697:14881..15143:IncFII(pCoo)_1__CR942285:93.993951	IncFII(pCoo)	CR942285	99.24
Kp10480	rectal	502	NODE_31_length_3637_cov_393.659259:40..320:Col440II_1__CP023921:90.780142	Col440II	CP023921	99.65
Kp10550	rectal	502	NODE_82_length_2043_cov_435.717641:339..469:Col(pHAD28)_1__KU674895:100.000000	Col(pHAD28)	KU674895	100
Kp10550	rectal	502	NODE_56_length_9288_cov_95.355092:4750..5440:pKP1433_1__JX397875:99.423632	pKP1433	JX397875	99.71
Kp10550	rectal	502	NODE_54_length_11750_cov_47.017637:8455..9014:IncFIB(K)_1__JN233704:98.928571	IncFIB(K)	JN233704	100
Kp10550	rectal	502	NODE_28_length_58925_cov_48.631688:45906..46053:IncFII(K)_1__CP000648:97.972973	IncFII(K)	CP000648	100
Kp10550	rectal	502	NODE_43_length_23350_cov_61.704259:5430..5817:IncFIA(HI1)_1__AF250878:97.164948	IncFIA(HI1)	AF250878	100
Kp10550	rectal	502	NODE_27_length_64013_cov_76.896801:27485..27712:IncFII(Yp)_1__CP000670:94.801595	IncFII(Yp)	CP000670	99.13
Kp10550	rectal	502	NODE_33_length_43058_cov_53.419091:3201..3348:IncFII(K)_1__CP000648:94.594595	IncFII(K)	CP000648	100
Kp10550	rectal	502	NODE_72_length_3676_cov_310.787264:1654..1784:Col(pHAD28)_1__KU674895:93.129771	Col(pHAD28)	KU674895	100
Kp11407	rectal	502	NODE_11_length_81280_cov_32.385568:67010..67569:IncFIB(K)_1__JN233704:98.750000	IncFIB(K)	JN233704	100
Kp11407	rectal	502	NODE_13_length_64685_cov_31.028161:6669..6816:IncFII(K)_1__CP000648:97.972973	IncFII(K)	CP000648	100
Kp11407	rectal	502	NODE_8_length_109702_cov_26.912444:25976..26535:IncFIB(pKPHS1)_1__CP003223:95.535714	IncFIB(pKPHS1)	CP003223	100
Kp11407	rectal	502	NODE_20_length_4294_cov_285.188865:3830..3960:Col(pHAD28)_1__KU674895:92.366412	Col(pHAD28)	KU674895	100
Kp2709	rectal	503	NODE_64_length_9167_cov_26.210066:3811..4198:IncFIA(HI1)_1__AF250878:96.391753	IncFIA(HI1)	AF250878	100
Kp2709	rectal	503	NODE_80_length_3452_cov_186.512180:2966..3079:Col440I_1__CP023920:94.736842	Col440I	CP023920	100
Kp3882	rectal	503	NODE_40_length_19491_cov_27.681884:7819..8069:IncR_1__DQ449578:99.601594	IncR	DQ449578	100
Kp3882	rectal	503	NODE_17_length_109948_cov_17.280484:26534..27093:IncFIB(pKPHS1)_1__CP003223:98.750000	IncFIB(pKPHS1)	CP003223	100
Kp3882	rectal	503	NODE_48_length_5276_cov_78.252670:659..772:Col440I_1__CP023920:94.736842	Col440I	CP023920	100
Kp3882	rectal	503	NODE_52_length_4624_cov_117.217256:516..635:Col(pHAD28)_1__KU674895:86.259542	Col(pHAD28)	KU674895	91.6
Kp3882	rectal	503	NODE_25_length_55222_cov_39.252981:3340..3914:IncFII(pKPX1)_1__AP012055:90.641248	IncFII(pKPX1)	AP012055	99.65
Kp4817	rectal	503	-	None	-	-
Kp3967	rectal	504	NODE_18_length_29940_cov_26.121155:8713..9100:IncFIA(HI1)_1__AF250878:97.422680	IncFIA(HI1)	AF250878	100
Kp3967	rectal	504	NODE_25_length_4024_cov_138.976135:69..198:Col(pHAD28)_1__KU674895:91.661325	Col(pHAD28)	KU674895	99.24
Kp4733	rectal	504	NODE_26_length_22066_cov_89.636811:1989..2502:IncN_1__AY046276:99.416342	IncN	AY046276	100
Kp4733	rectal	504	NODE_23_length_33813_cov_35.699430:21733..22292:IncFIB(K)_1__JN233704:98.750000	IncFIB(K)	JN233704	100
Kp4733	rectal	504	NODE_35_length_4782_cov_122.490870:1812..1925:Col440I_1__CP023920:97.368421	Col440I	CP023920	100
Kp5478	rectal	504	-	None	-	-
Kp10120	rectal	505	NODE_57_length_2043_cov_321.585073:1564..1694:Col(pHAD28)_1__KU674895:100.000000	Col(pHAD28)	KU674895	100
Kp10120	rectal	505	NODE_34_length_25945_cov_57.700093:19164..19677:IncN_1__AY046276:99.221790	IncN	AY046276	100
Kp10120	rectal	505	NODE_44_length_10344_cov_26.490066:7131..7690:IncFIB(K)_1__JN233704:98.928571	IncFIB(K)	JN233704	100
Kp10120	rectal	505	NODE_25_length_56378_cov_29.074665:19049..19196:IncFII(K)_1__CP000648:97.972973	IncFII(K)	CP000648	100
Kp10120	rectal	505	NODE_81_length_471_cov_131.627907:265..378:Col440I_1__CP023920:94.736842	Col440I	CP023920	100
Kp10120	rectal	505	NODE_56_length_2708_cov_162.702828:1871..2001:Col(pHAD28)_1__KU674895:93.129771	Col(pHAD28)	KU674895	100
Kp10440	rectal	505	-	None	-	-
Kp11162	rectal	505	NODE_7_length_146709_cov_47.150448:89714..89861:IncFII(K)_1__CP000648:100.000000	IncFII(K)	CP000648	100
Kp11162	rectal	505	NODE_11_length_57975_cov_62.004304:22598..23014:IncC_1__JN157804:100.000000	IncC	JN157804	100
Kp11162	rectal	505	NODE_14_length_27929_cov_63.910474:10369..10619:IncR_1__DQ449578:99.203187	IncR	DQ449578	100
Kp11162	rectal	505	NODE_7_length_146709_cov_47.150448:6514..7073:IncFIB(K)_1__JN233704:98.750000	IncFIB(K)	JN233704	100
Kp11162	rectal	505	NODE_12_length_41479_cov_59.630852:3837..3984:IncFII(K)_1__CP000648:94.594595	IncFII(K)	CP000648	100
Kp4591	rectal	701	-	None	-	-
Kp4705	rectal	701	-	None	-	-
Kp4745	rectal	701	-	None	-	-
Kp6733	rectal	702	NODE_95_length_2646_cov_188.899960:1250..1447:Col(IMGS31)_1__NC_011406:98.989899	Col(IMGS31)	NC011406	100
Kp6733	rectal	702	NODE_61_length_9920_cov_28.103543:7022..7581:IncFIB(K)_1__JN233704:98.928571	IncFIB(K)	JN233704	100
Kp6733	rectal	702	NODE_24_length_65420_cov_29.363362:15588..15735:IncFII(K)_1__CP000648:97.297297	IncFII(K)	CP000648	100
Kp6733	rectal	702	NODE_64_length_9636_cov_132.178252:246..359:Col440I_1__CP023920:94.736842	Col440I	CP023920	100
Kp6733	rectal	702	NODE_85_length_4223_cov_161.197754:2805..2917:Col440I_1__CP023920:89.473684	Col440I	CP023920	99.12
Kp6805	rectal	702	NODE_10_length_164722_cov_31.873897:151916..152475:repB_KLEB_VIR_AP006726:99.821429	repB	AP006726	100
Kp6805	rectal	702	NODE_10_length_164722_cov_31.873897:136502..137071:IncHI1B(pNDM-MAR)_1__JN420336:99.122807	IncHI1B(pNDM-MAR)	JN420336	100
Kp6840	rectal	702	-	None	-	-
Kp4955	rectal	703	NODE_21_length_41154_cov_22.550759:28344..28903:IncFIB(K)_1__JN233704:100.000000	IncFIB(K)	JN233704	100
Kp4955	rectal	703	NODE_43_length_3707_cov_48.582123:337..450:Col440I_1__CP023920:97.368421	Col440I	CP023920	100
Kp4955	rectal	703	NODE_20_length_44005_cov_42.236702:9621..9848:IncFII(Yp)_1__CP000670:94.801595	IncFII(Yp)	CP000670	99.13
Kp5078	rectal	703	NODE_26_length_20986_cov_20.692890:12820..13379:IncFIB(K)(pCAV1099-114)_1__CP011596:99.821429	IncFIB(K)(pCAV1099-114)	CP011596	100
Kp5078	rectal	703	NODE_40_length_3463_cov_138.789269:1552..1682:Col(pHAD28)_1__KU674895:93.129771	Col(pHAD28)	KU674895	100
Kp5184	rectal	703	NODE_11_length_44411_cov_26.946166:37270..37829:IncFIB(K)_1__JN233704:98.928571	IncFIB(K)	JN233704	100
Kp5184	rectal	703	NODE_23_length_4040_cov_158.484794:606..720:Col(pHAD28)_1__KU674895:81.679389	Col(pHAD28)	KU674895	87.79
Kp5184	rectal	703	NODE_24_length_3694_cov_86.640875:2958..3076:Col(pHAD28)_1__KU674895:82.512723	Col(pHAD28)	KU674895	90.84
Kp10406	rectal	704	-	None	-	-
Kp10482	rectal	704	NODE_35_length_5616_cov_151.120240:2416..2697:Col440II_1__CP023921:97.163121	Col440II	CP023921	100
Kp10482	rectal	704	NODE_19_length_92622_cov_33.063679:6067..6454:IncFIA(HI1)_1__AF250878:96.649485	IncFIA(HI1)	AF250878	100
Kp10482	rectal	704	NODE_19_length_92622_cov_33.063679:74109..74336:IncFII(pKP91)_1__CP000966:94.816784	IncFII(pKP91)	CP000966	98.7
Kp10482	rectal	704	NODE_17_length_111215_cov_25.209969:85846..86405:IncFIB(pKPHS1)_1__CP003223:95.714286	IncFIB(pKPHS1)	CP003223	100
Kp10482	rectal	704	NODE_35_length_5616_cov_151.120240:3274..3402:Col(pHAD28)_1__KU674895:91.603053	Col(pHAD28)	KU674895	98.47
Kp10482	rectal	704	NODE_37_length_4198_cov_189.599853:3692..3804:Col440I_1__CP023920:90.427824	Col440I	CP023920	99.12
Kp10614	rectal	704	NODE_36_length_23236_cov_62.277078:6623..6873:IncR_1__DQ449578:100.000000	IncR	DQ449578	100
Kp10614	rectal	704	NODE_49_length_10029_cov_44.750959:7131..7690:IncFIB(K)_1__JN233704:98.928571	IncFIB(K)	JN233704	100
Kp10614	rectal	704	NODE_26_length_60609_cov_61.340052:41427..41574:IncFII(K)_1__CP000648:98.648649	IncFII(K)	CP000648	100
Kp10614	rectal	704	NODE_25_length_69943_cov_72.974304:56257..56484:IncFII(Yp)_1__CP000670:94.801595	IncFII(Yp)	CP000670	99.13
Kp10614	rectal	704	NODE_26_length_60609_cov_61.340052:36800..36930:Col(pHAD28)_1__KU674895:93.129771	Col(pHAD28)	KU674895	100
Kp10614	rectal	704	NODE_64_length_4936_cov_177.064047:4627..4757:Col(pHAD28)_1__KU674895:92.366412	Col(pHAD28)	KU674895	100
Kp10193	rectal	706	NODE_16_length_65438_cov_74.718960:15972..16113:IncI1-I(Gamma)_1__AP005147:100.000000	IncI1-I(Gamma)	AP005147	100
Kp10193	rectal	706	NODE_12_length_89070_cov_27.982157:43788..44347:IncFIB(K)_1__JN233704:98.750000	IncFIB(K)	JN233704	100
Kp9831	rectal	706	-	None	-	-
Kp9983	rectal	706	NODE_10_length_158510_cov_27.639829:154346..154904:IncFIB(K)(pCAV1099-114)_1__CP011596:95.892857	IncFIB(K)(pCAV1099-114)	CP011596	99.82
Kp9983	rectal	706	NODE_10_length_158510_cov_27.639829:67278..67423:IncFII(K)_1__CP000648:92.649744	IncFII(K)	CP000648	98.65
Kp10367	rectal	707	NODE_22_length_3674_cov_1.254438:3136..3266:Col(pHAD28)_1__KU674895:93.129771	Col(pHAD28)	KU674895	100
Kp10367	rectal	707	NODE_25_length_3054_cov_1.324564:2858..2988:Col(pHAD28)_1__KU674895:90.839695	Col(pHAD28)	KU674895	100
Kp9861	rectal	707	NODE_31_length_23169_cov_56.929607:21464..21693:IncFII(pKP91)_1__CP000966:100.000000	IncFII(pKP91)	CP000966	100
Kp9861	rectal	707	NODE_21_length_40293_cov_50.546158:19361..19611:IncR_1__DQ449578:99.203187	IncR	DQ449578	100
Kp9861	rectal	707	NODE_32_length_22169_cov_32.642365:14819..15378:IncFIB(K)_1__JN233704:98.928571	IncFIB(K)	JN233704	100
Kp9918	rectal	707	NODE_12_length_65853_cov_46.061878:21199..21493:FIA(pBK30683)_1__KF954760:99.661017	FIA(pBK30683)	KF954760	100
Kp9918	rectal	707	NODE_9_length_145798_cov_39.202031:128292..128439:IncFII(K)_1__CP000648:97.297297	IncFII(K)	CP000648	100
Kp9918	rectal	707	NODE_9_length_145798_cov_39.202031:45309..45867:IncFIB(K)(pCAV1099-114)_1__CP011596:95.714286	IncFIB(K)(pCAV1099-114)	CP011596	99.82
Kp9918	rectal	707	NODE_20_length_3797_cov_225.765123:3399..3512:Col440I_1__CP023920:95.614035	Col440I	CP023920	100
Kp9918	rectal	707	NODE_19_length_4902_cov_164.656963:2919..3028:Col440I_1__CP023920:87.719298	Col440I	CP023920	96.49
Kp4280	rectal	708	NODE_19_length_21018_cov_35.001963:12820..13379:IncFIB(K)(pCAV1099-114)_1__CP011596:99.821429	IncFIB(K)(pCAV1099-114)	CP011596	100
Kp4280	rectal	708	NODE_16_length_31212_cov_65.519768:25312..25562:IncR_1__DQ449578:99.601594	IncR	DQ449578	100
Kp4280	rectal	708	NODE_37_length_1956_cov_496.704757:1775..1905:Col(pHAD28)_1__KU674895:93.129771	Col(pHAD28)	KU674895	100
Kp4467	rectal	708	-	None	-	-
Kp4635	rectal	708	-	None	-	-
Kp6535	rectal	709	NODE_8_length_193855_cov_25.342898:180326..180885:IncFIB(K)_1__JN233704:98.928571	IncFIB(K)	JN233704	100
Kp6535	rectal	709	NODE_15_length_79920_cov_28.289649:17927..18314:IncFIA(HI1)_1__AF250878:97.164948	IncFIA(HI1)	AF250878	100
Kp6535	rectal	709	NODE_15_length_79920_cov_28.289649:42640..42787:IncFII(K)_1__CP000648:94.594595	IncFII(K)	CP000648	100
Kp6928	rectal	709	-	None	-	-
Kp7021	rectal	709	NODE_22_length_21581_cov_65.494313:12067..12317:IncR_1__DQ449578:100.000000	IncR	DQ449578	100
Kp7021	rectal	709	NODE_26_length_12655_cov_37.283285:4721..5280:IncFIB(K)_1__JN233704:98.928571	IncFIB(K)	JN233704	100
Kp7021	rectal	709	NODE_10_length_108640_cov_37.540332:5715..6274:IncFIB(pKPHS1)_1__CP003223:95.535714	IncFIB(pKPHS1)	CP003223	100
Kp9077	rectal	710	NODE_17_length_49883_cov_25.585678:6583..7142:IncFIB(K)_1__JN233704:98.928571	IncFIB(K)	JN233704	100
Kp9077	rectal	710	NODE_13_length_108173_cov_34.643430:86606..86832:IncFII(pKP91)_1__CP000966:88.855136	IncFII(pKP91)	CP000966	97.83
Kp9364	rectal	710	NODE_23_length_9516_cov_31.870700:5643..6202:IncFIB(K)(pCAV1099-114)_1__CP011596:99.821429	IncFIB(K)(pCAV1099-114)	CP011596	100
Kp9364	rectal	710	NODE_32_length_4932_cov_169.822477:3014..3122:Col440I_1__CP023920:88.596491	Col440I	CP023920	95.61
Kp9421	rectal	710	NODE_39_length_5378_cov_303.573605:203..484:Col440II_1__CP023921:100.000000	Col440II	CP023921	100
Kp9421	rectal	710	NODE_18_length_41605_cov_57.528256:13612..13862:IncR_1__DQ449578:99.203187	IncR	DQ449578	100
Kp9421	rectal	710	NODE_37_length_9270_cov_46.107842:6237..6796:IncFIB(K)_1__JN233704:98.928571	IncFIB(K)	JN233704	100
Kp9421	rectal	710	NODE_43_length_3624_cov_46.957106:2528..2755:IncFII(pKP91)_1__CP000966:94.816784	IncFII(pKP91)	CP000966	98.7
Kp9421	rectal	710	NODE_39_length_5378_cov_303.573605:4747..4877:Col(pHAD28)_1__KU674895:92.366412	Col(pHAD28)	KU674895	100
Kp9421	rectal	710	NODE_17_length_57505_cov_73.001882:32807..33375:IncFII(pKPX1)_1__AP012055:90.290137	IncFII(pKPX1)	AP012055	98.27
Kp4140	rectal	711	-	None	-	-
Kp4459	rectal	711	-	None	-	-
Kp4468	rectal	711	NODE_39_length_14961_cov_26.189025:7017..7576:IncFIB(K)_1__JN233704:98.928571	IncFIB(K)	JN233704	100
Kp4468	rectal	711	NODE_48_length_6972_cov_28.263988:1686..1833:IncFII(K)_1__CP000648:97.297297	IncFII(K)	CP000648	100
Kp4468	rectal	711	NODE_49_length_6018_cov_155.060431:3127..3257:Col(pHAD28)_1__KU674895:94.656489	Col(pHAD28)	KU674895	100
Kp4468	rectal	711	NODE_57_length_3457_cov_185.863964:1663..1793:Col(pHAD28)_1__KU674895:93.129771	Col(pHAD28)	KU674895	100
Kp4819	rectal	712	NODE_15_length_84590_cov_32.671099:67010..67569:IncFIB(K)_1__JN233704:100.000000	IncFIB(K)	JN233704	100
Kp4819	rectal	712	NODE_30_length_3978_cov_196.602181:212..330:Col(pHAD28)_1__KU674895:83.969466	Col(pHAD28)	KU674895	90.84
Kp4819	rectal	712	NODE_30_length_3978_cov_196.602181:913..1193:Col440II_1__CP023921:90.425532	Col440II	CP023921	99.65
Kp5060	rectal	712	-	None	-	-
Kp5123	rectal	712	-	None	-	-
Kp5477	rectal	713	NODE_30_length_16077_cov_33.900188:7819..8069:IncR_1__DQ449578:99.601594	IncR	DQ449578	100
Kp5477	rectal	713	NODE_77_length_528_cov_0.359102:298..412:Col(pHAD28)_1__KU674895:81.679389	Col(pHAD28)	KU674895	87.79
Kp5477	rectal	713	NODE_19_length_55242_cov_44.749651:3342..3916:IncFII(pKPX1)_1__AP012055:90.641248	IncFII(pKPX1)	AP012055	99.65
Kp5854	rectal	713	NODE_16_length_78415_cov_26.801055:65197..65756:IncFIB(K)_1__JN233704:98.928571	IncFIB(K)	JN233704	100
Kp5854	rectal	713	NODE_37_length_1875_cov_317.474828:1417..1607:ColpVC_1__JX133088:95.854922	ColpVC	JX133088	98.96
Kp5854	rectal	713	NODE_16_length_78415_cov_26.801055:1781..1928:IncFII(K)_1__CP000648:95.945946	IncFII(K)	CP000648	100
Kp5854	rectal	713	NODE_30_length_4292_cov_123.002161:1963..2093:Col(pHAD28)_1__KU674895:91.603053	Col(pHAD28)	KU674895	100
Kp6126	rectal	713	NODE_45_length_9910_cov_26.277931:2340..2899:IncFIB(K)_1__JN233704:98.928571	IncFIB(K)	JN233704	100
Kp6126	rectal	713	NODE_63_length_2987_cov_28.125524:1141..1288:IncFII(K)_1__CP000648:97.972973	IncFII(K)	CP000648	100
Kp6126	rectal	713	NODE_51_length_5484_cov_164.757140:4078..4192:Col440I_1__CP023920:97.391304	Col440I	CP023920	100
Kp6126	rectal	713	NODE_62_length_3026_cov_204.697827:1642..1755:Col440I_1__CP023920:94.736842	Col440I	CP023920	100
Kp6126	rectal	713	NODE_123_length_292_cov_0.854545:127..239:Col440I_1__CP023920:93.036319	Col440I	CP023920	99.12
Kp6126	rectal	713	NODE_53_length_4492_cov_147.670332:539..669:Col(pHAD28)_1__KU674895:92.366412	Col(pHAD28)	KU674895	100
Kp5803	rectal	715	NODE_63_length_9902_cov_25.478465:2340..2899:IncFIB(K)_1__JN233704:98.928571	IncFIB(K)	JN233704	100
Kp5803	rectal	715	NODE_93_length_4235_cov_36.143135:1414..1561:IncFII(K)_1__CP000648:97.297297	IncFII(K)	CP000648	100
Kp5803	rectal	715	NODE_79_length_5912_cov_121.979430:1693..1802:Col440I_1__CP023920:92.105263	Col440I	CP023920	96.49
Kp6032	rectal	715	-	None	-	-
Kp6070	rectal	715	NODE_12_length_5379_cov_184.803313:4104..4385:Col440II_1__CP023921:100.000000	Col440II	CP023921	100
Kp6070	rectal	715	NODE_7_length_218689_cov_27.720519:74221..74780:IncFIB(K)_1__JN233704:98.928571	IncFIB(K)	JN233704	100
Kp6070	rectal	715	NODE_12_length_5379_cov_184.803313:3396..3526:Col(pHAD28)_1__KU674895:92.366412	Col(pHAD28)	KU674895	100
Kp4500	rectal	716	-	None	-	-
Kp4888	rectal	716	NODE_19_length_84586_cov_31.903871:17022..17581:IncFIB(K)_1__JN233704:100.000000	IncFIB(K)	JN233704	100
Kp4888	rectal	716	NODE_15_length_110268_cov_24.687610:42218..42777:IncFIB(pKPHS1)_1__CP003223:95.178571	IncFIB(pKPHS1)	CP003223	100
Kp4938	rectal	716	NODE_8_length_110983_cov_22.954148:26557..27116:IncFIB(pKPHS1)_1__CP003223:98.035714	IncFIB(pKPHS1)	CP003223	100
Kp4938	rectal	716	NODE_10_length_97120_cov_34.610580:10419..10806:IncFIA(HI1)_1__AF250878:96.649485	IncFIA(HI1)	AF250878	100
Kp4938	rectal	716	NODE_10_length_97120_cov_34.610580:78461..78688:IncFII(pKP91)_1__CP000966:94.816784	IncFII(pKP91)	CP000966	98.7
Kp3360	rectal	717	NODE_3_length_307626_cov_29.178677:280713..280860:IncFII(K)_1__CP000648:99.324324	IncFII(K)	CP000648	100
Kp3360	rectal	717	NODE_39_length_21370_cov_32.394389:8180..8739:IncFIB(K)_1__JN233704:98.928571	IncFIB(K)	JN233704	100
Kp3577	rectal	717	NODE_13_length_85063_cov_30.894968:70438..70825:IncFIA(HI1)_1__AF250878:96.649485	IncFIA(HI1)	AF250878	100
Kp3577	rectal	717	NODE_13_length_85063_cov_30.894968:2620..2847:IncFII(pKP91)_1__CP000966:94.816784	IncFII(pKP91)	CP000966	98.7
Kp3707	rectal	717	NODE_21_length_16991_cov_16.384843:13280..13875:pKPC-CAV1321_1__CP011611:100.000000	pKPC-CAV1321	CP011611	100
Kp3707	rectal	717	NODE_11_length_68707_cov_21.149038:7746..8305:IncFIB(K)(pCAV1099-114)_1__CP011596:99.821429	IncFIB(K)(pCAV1099-114)	CP011596	100
Kp3707	rectal	717	NODE_17_length_34569_cov_15.686662:16744..17305:IncFII(pECLA)_1__CP001919:75.100402	IncFII(pECLA)	CP001919	75.23
Kp7201	rectal	718	-	None	-	-
Kp7238	rectal	718	NODE_17_length_47044_cov_49.292559:42423..42570:IncFII(K)_1__CP000648:98.648649	IncFII(K)	CP000648	100
Kp7238	rectal	718	NODE_23_length_3978_cov_206.160478:2201..2319:Col(pHAD28)_1__KU674895:83.969466	Col(pHAD28)	KU674895	90.84
Kp7238	rectal	718	NODE_23_length_3978_cov_206.160478:1338..1618:Col440II_1__CP023921:90.425532	Col440II	CP023921	99.65
Kp7307	rectal	718	NODE_12_length_115800_cov_31.881321:104253..104482:IncFII(pKP91)_1__CP000966:100.000000	IncFII(pKP91)	CP000966	100
Kp7307	rectal	718	NODE_19_length_56471_cov_33.685415:11664..11811:IncFII(K)_1__CP000648:100.000000	IncFII(K)	CP000648	100
Kp7307	rectal	718	NODE_12_length_115800_cov_31.881321:16018..16268:IncR_1__DQ449578:99.203187	IncR	DQ449578	100
Kp7307	rectal	718	NODE_19_length_56471_cov_33.685415:39161..39720:IncFIB(K)_1__JN233704:98.750000	IncFIB(K)	JN233704	100
Kp7902	rectal	719	NODE_52_length_9160_cov_23.699989:3453..4012:IncFIB(K)(pCAV1099-114)_1__CP011596:99.642857	IncFIB(K)(pCAV1099-114)	CP011596	100
Kp7902	rectal	719	NODE_55_length_4639_cov_110.398715:1693..1806:Col440I_1__CP023920:97.368421	Col440I	CP023920	100
Kp7902	rectal	719	NODE_29_length_52597_cov_39.160778:49274..49421:IncFII(K)_1__CP000648:97.297297	IncFII(K)	CP000648	100
Kp7902	rectal	719	NODE_60_length_2581_cov_145.898533:76..189:Col440I_1__CP023920:95.614035	Col440I	CP023920	100
Kp7902	rectal	719	NODE_165_length_181_cov_319.388889:1..91:Col(pHAD28)_1__KU674895:64.885496	Col(pHAD28)	KU674895	69.47
Kp7902	rectal	719	NODE_57_length_3924_cov_158.170398:37..155:Col(pHAD28)_1__KU674895:83.969466	Col(pHAD28)	KU674895	90.84
Kp7902	rectal	719	NODE_57_length_3924_cov_158.170398:3025..3305:Col440II_1__CP023921:90.425532	Col440II	CP023921	99.65
Kp8152	rectal	719	-	None	-	-
Kp8324	rectal	719	NODE_35_length_10029_cov_32.607655:7131..7690:IncFIB(K)_1__JN233704:98.928571	IncFIB(K)	JN233704	100
Kp8324	rectal	719	NODE_38_length_5473_cov_208.492705:4078..4192:Col440I_1__CP023920:97.391304	Col440I	CP023920	100
Kp8324	rectal	719	NODE_23_length_65907_cov_34.383855:46714..46861:IncFII(K)_1__CP000648:97.297297	IncFII(K)	CP000648	100
Kp8324	rectal	719	NODE_45_length_3037_cov_572.625086:1665..1795:Col(pHAD28)_1__KU674895:93.129771	Col(pHAD28)	KU674895	100
Kp8880	rectal	720	-	None	-	-
Kp9001	rectal	720	NODE_31_length_35522_cov_27.500777:10431..10681:IncR_1__DQ449578:99.601594	IncR	DQ449578	100
Kp9001	rectal	720	NODE_53_length_9600_cov_24.682994:2340..2899:IncFIB(K)_1__JN233704:98.928571	IncFIB(K)	JN233704	100
Kp9001	rectal	720	NODE_37_length_23832_cov_26.584223:9441..9588:IncFII(K)_1__CP000648:97.972973	IncFII(K)	CP000648	100
Kp9001	rectal	720	NODE_44_length_16131_cov_47.360160:4476..4623:IncFII(K)_1__CP000648:95.945946	IncFII(K)	CP000648	100
Kp9001	rectal	720	NODE_120_length_485_cov_166.972067:94..203:Col440I_1__CP023920:92.105263	Col440I	CP023920	96.49
Kp9001	rectal	720	NODE_59_length_6026_cov_80.760468:1421..1536:Col(pHAD28)_1__KU674895:83.969466	Col(pHAD28)	KU674895	88.55
Kp9001	rectal	720	NODE_113_length_607_cov_128.181250:189..319:Col(pHAD28)_1__KU674895:93.129771	Col(pHAD28)	KU674895	100
Kp9311	rectal	720	NODE_17_length_11051_cov_35.862596:5164..5723:IncFIB(K)(pCAV1099-114)_1__CP011596:100.000000	IncFIB(K)(pCAV1099-114)	CP011596	100
Kp9311	rectal	720	NODE_12_length_61607_cov_93.057889:726..1239:IncN_1__AY046276:99.221790	IncN	AY046276	100
Kp7160	rectal	721	NODE_14_length_46107_cov_22.031992:6669..7228:IncFIB(K)_1__JN233704:99.107143	IncFIB(K)	JN233704	100
Kp7160	rectal	721	NODE_24_length_8909_cov_176.255637:4081..4530:IncQ2_1__FJ696404:98.888889	IncQ2	FJ696404	100
Kp7160	rectal	721	NODE_20_length_21567_cov_27.979711:20859..21006:IncFII(K)_1__CP000648:95.945946	IncFII(K)	CP000648	100
Kp7160	rectal	721	NODE_26_length_5294_cov_40.227985:1051..1204:Col156_1__NC_009781:94.805195	Col156	NC009781	100
Kp7160	rectal	721	NODE_32_length_2285_cov_190.860056:2005..2135:Col(pHAD28)_1__KU674895:92.366412	Col(pHAD28)	KU674895	100
Kp7360	rectal	721	NODE_26_length_18159_cov_34.862578:13448..14007:IncFIB(K)_1__JN233704:98.928571	IncFIB(K)	JN233704	100
Kp7360	rectal	721	NODE_24_length_20759_cov_50.733521:6014..6401:IncFIA(HI1)_1__AF250878:97.422680	IncFIA(HI1)	AF250878	100
Kp7447	rectal	721	NODE_78_length_4757_cov_19.179698:309..747:IncFIB(pNDM-Mar)_1__JN420336:100.000000	IncFIB(pNDM-Mar)	JN420336	100
Kp7447	rectal	721	NODE_99_length_2043_cov_171.032881:350..480:Col(pHAD28)_1__KU674895:100.000000	Col(pHAD28)	KU674895	100
Kp7447	rectal	721	NODE_65_length_10029_cov_24.998182:7131..7690:IncFIB(K)_1__JN233704:98.928571	IncFIB(K)	JN233704	100
Kp7447	rectal	721	NODE_32_length_45182_cov_27.281034:19049..19196:IncFII(K)_1__CP000648:97.972973	IncFII(K)	CP000648	100
Kp7447	rectal	721	NODE_89_length_3671_cov_228.656885:2396..2677:Col440II_1__CP023921:97.517730	Col440II	CP023921	100
Kp7447	rectal	721	NODE_75_length_5484_cov_107.592122:4078..4192:Col440I_1__CP023920:97.391304	Col440I	CP023920	100
Kp7447	rectal	721	NODE_129_length_564_cov_143.910755:187..300:Col440I_1__CP023920:94.736842	Col440I	CP023920	100
Kp7447	rectal	721	NODE_80_length_4487_cov_106.910321:534..664:Col(pHAD28)_1__KU674895:92.366412	Col(pHAD28)	KU674895	100
Kp7447	rectal	721	NODE_84_length_4145_cov_152.361125:2444..2574:Col(pHAD28)_1__KU674895:91.603053	Col(pHAD28)	KU674895	100
Kp9270	rectal	722	NODE_15_length_2890_cov_23.752805:861..1420:IncFIB(K)(pCAV1099-114)_1__CP011596:99.642857	IncFIB(K)(pCAV1099-114)	CP011596	100
Kp9270	rectal	722	NODE_12_length_30480_cov_25.544658:28370..28664:FIA(pBK30683)_1__KF954760:96.610169	FIA(pBK30683)	KF954760	100
Kp9270	rectal	722	NODE_9_length_73334_cov_24.253528:11297..11525:IncFII(pKP91)_1__CP000966:88.971139	IncFII(pKP91)	CP000966	97.83
Kp9400	rectal	722	NODE_11_length_46186_cov_38.522417:40407..40657:IncR_1__DQ449578:100.000000	IncR	DQ449578	100
Kp9400	rectal	722	NODE_10_length_58234_cov_32.478772:32181..32740:IncFIB(K)(pCAV1099-114)_1__CP011596:99.642857	IncFIB(K)(pCAV1099-114)	CP011596	100
Kp9400	rectal	722	NODE_11_length_46186_cov_38.522417:2317..2703:IncFIA(HI1)_1__AF250878:98.195876	IncFIA(HI1)	AF250878	99.74
Kp9400	rectal	722	NODE_34_length_1907_cov_414.214607:609..801:ColpVC_1__JX133088:97.409326	ColpVC	JX133088	100
Kp9426	rectal	722	-	None	-	-
Kp4341	rectal	723	-	None	-	-
Kp4650	rectal	723	NODE_20_length_22640_cov_29.139786:19411..19970:IncFIB(K)_1__JN233704:100.000000	IncFIB(K)	JN233704	100
Kp4650	rectal	723	NODE_12_length_110801_cov_23.711088:48314..48873:IncFIB(pKPHS1)_1__CP003223:95.714286	IncFIB(pKPHS1)	CP003223	100
Kp4722	rectal	723	NODE_8_length_109702_cov_29.742523:25976..26535:IncFIB(pKPHS1)_1__CP003223:95.535714	IncFIB(pKPHS1)	CP003223	100
Kp4722	rectal	723	NODE_17_length_4294_cov_195.457403:207..337:Col(pHAD28)_1__KU674895:92.366412	Col(pHAD28)	KU674895	100
Kp5871	rectal	724	NODE_15_length_48835_cov_38.328180:32395..32645:IncR_1__DQ449578:100.000000	IncR	DQ449578	100
Kp5871	rectal	724	NODE_22_length_18288_cov_26.520291:11018..11577:IncFIB(K)_1__JN233704:99.107143	IncFIB(K)	JN233704	100
Kp5871	rectal	724	NODE_13_length_93025_cov_37.362516:11647..11896:IncFII(S)_1__CP000858:86.822255	IncFII(S)	CP000858	94.27
Kp5871	rectal	724	NODE_13_length_93025_cov_37.362516:82369..83011:IncFIB(pB171)_1__AB024946:91.446345	IncFIB(pB171)	AB024946	100
Kp6146	rectal	724	-	None	-	-
Kp6557	rectal	724	NODE_19_length_68662_cov_33.818501:14483..15042:repB_KLEB_VIR_AP006726:100.000000	repB	AP006726	100
Kp6557	rectal	724	NODE_18_length_85921_cov_33.577465:81908..82380:IncHI1B(pNDM-MAR)_1__JN420336:82.280702	IncHI1B(pNDM-MAR)	JN420336	82.98
Kp10638	rectal	801	NODE_18_length_26918_cov_47.433317:24460..24846:IncFIA(HI1)_1__AF250878:98.711340	IncFIA(HI1)	AF250878	99.74
Kp10638	rectal	801	NODE_20_length_21260_cov_34.839398:6626..7185:IncFIB(K)_1__JN233704:98.928571	IncFIB(K)	JN233704	100
Kp9149	rectal	801	NODE_25_length_9378_cov_36.801967:2323..2882:IncFIB(K)_1__JN233704:98.928571	IncFIB(K)	JN233704	100
Kp9149	rectal	801	NODE_28_length_4752_cov_37.247135:2706..3092:IncFIA(HI1)_1__AF250878:98.195876	IncFIA(HI1)	AF250878	99.74
Kp9149	rectal	801	NODE_34_length_2909_cov_250.695902:1430..1558:Col(pHAD28)_1__KU674895:91.603053	Col(pHAD28)	KU674895	98.47
Kp9726	rectal	801	-	None	-	-
Kp10318	rectal	802	NODE_9_length_202806_cov_40.745543:170935..171494:IncFIB(K)_1__JN233704:98.928571	IncFIB(K)	JN233704	100
Kp10318	rectal	802	NODE_19_length_3800_cov_200.283964:247..356:Col440I_1__CP023920:91.228070	Col440I	CP023920	96.49
Kp11172	rectal	802	-	None	-	-
Kp11488	rectal	802	NODE_16_length_9421_cov_97.589413:6387..6516:ColRNAI_1__DQ298019:100.000000	ColRNAI	DQ298019	100
Kp11488	rectal	802	NODE_10_length_97640_cov_37.259155:17270..17829:IncFIB(K)_1__JN233704:98.928571	IncFIB(K)	JN233704	100
Kp11488	rectal	802	NODE_10_length_97640_cov_37.259155:95776..95923:IncFII(K)_1__CP000648:95.945946	IncFII(K)	CP000648	100
