# Supplementary material for: Comparative genomics reveals plasmid-encoded genes associated with Klebsiella infection in colonized patients
Source: Research Square preprint supplement (doi:10.21203/rs.3.rs-1254643/v1), 2022-04-04
Supplement: Supplementary file 4 [file af99bb664ee60fb251516c58.xlsx]

## Sheet: Sheet1
Supplementary Table 4. Klebsiella genotyping with Kleborate
Kp number	Case status	Category	Stratum	Virulence score	Resistance score	Number resistance classes	Number resistance genes	Yersiniabactin	YbST	Colibactin	CbST	Aerobactin	AbST	Salmochelin	SmST	rmpA	rmpA2	K locus	gapA	infB	mdh	pgi	phoE	rpoB	tonB	ybtS	ybtX	ybtQ	ybtP	ybtA	irp2	irp1	ybtU	ybtT	ybtE	fyuA	clbA	clbB	clbC	clbD	clbE	clbF	clbG	clbH	clbI	clbL	clbM	clbN	clbO
Kp6653	1	rectal	2	1	1	7	11	ybt 10; ICEKp4	80-1LV	-	0	-	0	-	0	-	-	KL21	2	1	1	1	9	1	93	3	12	4	11	3	83*	18	3	10	16	2	-	-	-	-	-	-	-	-	-	-	-	-	-
Kp6566	0	rectal	2	0	0	1	0	-	0	-	0	-	0	-	0	-	-	KL24	18	22	26	23	31	13	49	-	-	-	-	-	-	-	-	-	-	-	-	-	-	-	-	-	-	-	-	-	-	-	-
Kp7028	0	rectal	2	0	0	0	0	-	0	-	0	-	0	-	0	-	-	-	16	18	21	27	47	22	146	-	-	-	-	-	-	-	-	-	-	-	-	-	-	-	-	-	-	-	-	-	-	-	-
Kp2816	1	rectal	3	0	0	0	0	-	0	-	0	-	0	-	0	-	-	KL53	16	24	21	53	50	33	207	-	-	-	-	-	-	-	-	-	-	-	-	-	-	-	-	-	-	-	-	-	-	-	-
Kp2790	0	rectal	3	0	0	1	0	-	0	-	0	-	0	-	0	-	-	KL?	2	60	11	1	4	8	24	-	-	-	-	-	-	-	-	-	-	-	-	-	-	-	-	-	-	-	-	-	-	-	-
Kp2841	0	rectal	3	0	1	1	0	-	0	-	0	-	0	-	0	-	-	KL71	5	1	5	1	7	11	24	-	-	-	-	-	-	-	-	-	-	-	-	-	-	-	-	-	-	-	-	-	-	-	-
Kp8833	1	rectal	4	1	1	1	0	ybt unknown	0	-	0	-	0	-	0	-	-	KL13	2	1	1	1	3	3	329	6*	4	20	61	1	126*	186*	2*	4	4	2*	-	-	-	-	-	-	-	-	-	-	-	-	-
Kp8611	0	rectal	4	0	0	1	0	-	0	-	0	-	0	-	0	-	-	KL154	14	1	2	1	21	1	1	-	-	-	-	-	-	-	-	-	-	-	-	-	-	-	-	-	-	-	-	-	-	-	-
Kp9161	0	rectal	4	0	0	0	0	-	0	-	0	-	0	-	0	-	-	KL28	2	3	1	1	4	4	4	-	-	-	-	-	-	-	-	-	-	-	-	-	-	-	-	-	-	-	-	-	-	-	-
Kp8399	1	rectal	5	0	2	6	8	-	0	-	0	-	0	-	0	-	-	KL107	3	3	1	1	1	1	79	-	-	-	-	-	-	-	-	-	-	-	-	-	-	-	-	-	-	-	-	-	-	-	-
Kp8236	0	rectal	5	0	0	1	0	-	0	-	0	-	0	-	0	-	-	KL22/KL37	2	1	2	1	10	1	19	-	-	-	-	-	-	-	-	-	-	-	-	-	-	-	-	-	-	-	-	-	-	-	-
Kp8678	0	rectal	5	0	0	0	0	-	0	-	0	-	0	-	0	-	-	KL48	18	22	26	96	252	13	51	-	-	-	-	-	-	-	-	-	-	-	-	-	-	-	-	-	-	-	-	-	-	-	-
Kp8570	1	rectal	7	0	0	1	0	-	0	-	0	-	0	-	0	-	-	KL30 (KL38)	2	3	2	279	48	4	4	-	-	-	-	-	-	-	-	-	-	-	-	-	-	-	-	-	-	-	-	-	-	-	-
Kp8139	0	rectal	7	0	0	0	0	-	0	-	0	-	0	-	0	-	-	KL35	16	24	21	27	41	22	67	-	-	-	-	-	-	-	-	-	-	-	-	-	-	-	-	-	-	-	-	-	-	-	-
Kp8422	0	rectal	7	0	0	0	0	-	0	-	0	-	0	-	0	-	-	KL?	2	5	1	1	7	1	6*	-	-	-	-	-	-	-	-	-	-	-	-	-	-	-	-	-	-	-	-	-	-	-	-
Kp4113	1	rectal	8	0	0	2	1	-	0	-	0	-	0	-	0	-	-	KL122	4	1	1	1	2	1	31	-	-	-	-	-	-	-	-	-	-	-	-	-	-	-	-	-	-	-	-	-	-	-	-
Kp3976	0	rectal	8	0	0	0	0	-	0	-	0	-	0	-	0	-	-	KL30	3	1	1	3	4	28	39	-	-	-	-	-	-	-	-	-	-	-	-	-	-	-	-	-	-	-	-	-	-	-	-
Kp4539	0	rectal	8	0	0	0	0	-	0	-	0	-	0	-	0	-	-	KL102	2	3	2	1	1	4	18	-	-	-	-	-	-	-	-	-	-	-	-	-	-	-	-	-	-	-	-	-	-	-	-
Kp6959	1	rectal	9	0	1	8	10	-	0	-	0	-	0	-	0	-	-	KL25	2	1	1	1	4	4	4	-	-	-	-	-	-	-	-	-	-	-	-	-	-	-	-	-	-	-	-	-	-	-	-
Kp6711	0	rectal	9	1	0	1	0	ybt 4; plasmid	125-2LV	-	0	-	0	-	0	-	-	KL118	2	9	2	1	13	1	16	30	34	37	44	28	104	102	25	23	45	49	-	-	-	-	-	-	-	-	-	-	-	-	-
Kp6973	0	rectal	9	0	0	1	0	-	0	-	0	-	0	-	0	-	-	KL49	2	1	1	1	9	1	4	-	-	-	-	-	-	-	-	-	-	-	-	-	-	-	-	-	-	-	-	-	-	-	-
Kp4571	1	rectal	10	0	0	1	0	-	0	-	0	-	0	-	0	-	-	KL10	6	3	1	20	12	4	4	-	-	-	-	-	-	-	-	-	-	-	-	-	-	-	-	-	-	-	-	-	-	-	-
Kp4078	0	rectal	10	1	0	0	0	ybt unknown	0	-	0	-	0	-	0	-	-	KL?	18	22	26	96*	94	13	51	23*	27	30*	18	44	156*	154*	9*	8*	26	35	-	-	-	-	-	-	-	-	-	-	-	-	-
Kp4368	0	rectal	10	0	0	1	0	-	0	-	0	-	0	-	0	-	-	KL28	3	5	95	1	16	1	12	-	-	-	-	-	-	-	-	-	-	-	-	-	-	-	-	-	-	-	-	-	-	-	-
Kp8059	1	rectal	11	1	0	1	0	ybt 10; ICEKp4	78-1LV	-	0	-	0	-	0	-	-	KL24	2	1	1	6	7	1	12	3	12	4	11	3	21	18*	3	10	16	2	-	-	-	-	-	-	-	-	-	-	-	-	-
Kp7643	0	rectal	11	0	0	0	0	-	0	-	0	-	0	-	0	-	-	KL3	2	1	1	1	9	1	13	-	-	-	-	-	-	-	-	-	-	-	-	-	-	-	-	-	-	-	-	-	-	-	-
Kp7914	0	rectal	11	0	0	0	0	-	0	-	0	-	0	-	0	-	-	KL20	16	45	21	27	29	22	200	-	-	-	-	-	-	-	-	-	-	-	-	-	-	-	-	-	-	-	-	-	-	-	-
Kp8207	1	rectal	12	0	0	0	0	-	0	-	0	-	0	-	0	-	-	KL118	2	3	1	1	9	102*	38	-	-	-	-	-	-	-	-	-	-	-	-	-	-	-	-	-	-	-	-	-	-	-	-
Kp7895	0	rectal	12	0	0	1	0	-	0	-	0	-	0	-	0	-	-	-	18	22	25*	61	167	69	51	-	-	-	-	-	-	-	-	-	-	-	-	-	-	-	-	-	-	-	-	-	-	-	-
Kp8047	0	rectal	12	1	0	1	0	ybt 10; ICEKp4	78-1LV	-	0	-	0	-	0	-	-	KL5	2	1	1	6	7	1	12	3	12	4	11	3	21*	18	3	10	16	2	-	-	-	-	-	-	-	-	-	-	-	-	-
Kp8293	1	rectal	13	0	0	0	0	-	0	-	0	-	0	-	0	-	-	KL9	2	3	1	1	1	4	4	-	-	-	-	-	-	-	-	-	-	-	-	-	-	-	-	-	-	-	-	-	-	-	-
Kp7980	0	rectal	13	0	0	0	0	-	0	-	0	-	0	-	0	-	-	-	58	24	43	40	106	29	67	-	-	-	-	-	-	-	-	-	-	-	-	-	-	-	-	-	-	-	-	-	-	-	-
Kp8335	0	rectal	13	0	0	1	0	-	0	-	0	-	0	-	0	-	-	-	18	22	26	22	94	20	51	-	-	-	-	-	-	-	-	-	-	-	-	-	-	-	-	-	-	-	-	-	-	-	-
Kp8544	1	rectal	14	0	0	7	10	-	0	-	0	-	0	-	0	-	-	KL15 (KL17,KL51,KL52)	2	3	1	1	109	56	18	-	-	-	-	-	-	-	-	-	-	-	-	-	-	-	-	-	-	-	-	-	-	-	-
Kp8946	0	rectal	14	0	1	8	11	-	0	-	0	-	0	-	0	-	-	KL15 (KL17,KL51,KL52)	2	5	1	1	12	1	18	-	-	-	-	-	-	-	-	-	-	-	-	-	-	-	-	-	-	-	-	-	-	-	-
Kp9063	0	rectal	14	0	0	0	0	-	0	-	0	-	0	-	0	-	-	KL24 (KL54,KL55)	79	3	1	1	9	1	13	-	-	-	-	-	-	-	-	-	-	-	-	-	-	-	-	-	-	-	-	-	-	-	-
Kp7031	1	rectal	15	0	0	0	0	-	0	-	0	-	0	-	0	-	-	KL2 (KL30)	1	6	1	1	1	1	1	-	-	-	-	-	-	-	-	-	-	-	-	-	-	-	-	-	-	-	-	-	-	-	-
Kp6966	0	rectal	15	0	0	0	0	-	0	-	0	-	0	-	0	-	-	KL10	3	1*	1	3	4	28	39	-	-	-	-	-	-	-	-	-	-	-	-	-	-	-	-	-	-	-	-	-	-	-	-
Kp6567	1	rectal	16	0	1	6	7	-	0	-	0	-	0	-	0	-	-	KL102 (KL149,KL155)	4	1	2	52	1	1	7	-	-	-	-	-	-	-	-	-	-	-	-	-	-	-	-	-	-	-	-	-	-	-	-
Kp6149	0	rectal	16	1	0	1	0	ybt 10; ICEKp4	78-1LV	-	0	-	0	-	0	-	-	KL5	2	1	1	6	7	1	12	3*	12	4	11	3	21	18	3	10	16	2	-	-	-	-	-	-	-	-	-	-	-	-	-
Kp6313	0	rectal	16	0	0	1	0	-	0	-	0	-	0	-	0	-	-	KL15 (KL17,KL51,KL52)	2	9	2	1	13	1	16	-	-	-	-	-	-	-	-	-	-	-	-	-	-	-	-	-	-	-	-	-	-	-	-
Kp5117	1	rectal	17	0	0	0	0	-	0	-	0	-	0	-	0	-	-	KL143	16	24	21	49	76	134	67	-	-	-	-	-	-	-	-	-	-	-	-	-	-	-	-	-	-	-	-	-	-	-	-
Kp5215	0	rectal	17	0	0	0	0	-	0	-	0	-	0	-	0	-	-	KL10	2	1	1	1	9	1	13	-	-	-	-	-	-	-	-	-	-	-	-	-	-	-	-	-	-	-	-	-	-	-	-
Kp5415	0	rectal	17	0	0	1	0	-	0	-	0	-	0	-	0	-	-	KL63	4	1	1	1	7	8	13	-	-	-	-	-	-	-	-	-	-	-	-	-	-	-	-	-	-	-	-	-	-	-	-
Kp3094	1	rectal	18	0	0	1	0	-	0	-	0	-	0	-	0	-	-	KL22/KL37	2	1	2	1	10	1	19	-	-	-	-	-	-	-	-	-	-	-	-	-	-	-	-	-	-	-	-	-	-	-	-
Kp3260	0	rectal	18	0	0	0	0	-	0	-	0	-	0	-	0	-	-	KL24	29	24	21	27	44	22	67	-	-	-	-	-	-	-	-	-	-	-	-	-	-	-	-	-	-	-	-	-	-	-	-
Kp3455	0	rectal	18	0	0	1	0	-	0	-	0	-	0	-	0	-	-	KL2	2	1	1	1	10	4	13	-	-	-	-	-	-	-	-	-	-	-	-	-	-	-	-	-	-	-	-	-	-	-	-
Kp6181	1	rectal	19	0	0	3	3	-	0	-	0	-	0	-	0	-	-	KL38	4	1	2	35*	1	7	4	-	-	-	-	-	-	-	-	-	-	-	-	-	-	-	-	-	-	-	-	-	-	-	-
Kp5844	0	rectal	19	1	0	1	0	ybt 9; ICEKp3	179-1LV	-	0	-	0	-	0	-	-	KL123	18	22	26	63	85	20	51	5	11	6	5	1	16	37*	9	5	5	11	-	-	-	-	-	-	-	-	-	-	-	-	-
Kp6593	0	rectal	19	1	0	1	0	ybt 4; plasmid	37-2LV	-	0	-	0	-	0	-	-	KL62	2	1	1	37	9	4	64	18	27	30	18	44	156*	154*	9	8	26	35	-	-	-	-	-	-	-	-	-	-	-	-	-
Kp4702	1	rectal	20	0	0	0	0	-	0	-	0	-	0	-	0	-	-	KL?	58	18	46	27	92	29	67	-	-	-	-	-	-	-	-	-	-	-	-	-	-	-	-	-	-	-	-	-	-	-	-
Kp4433	0	rectal	20	0	0	0	0	-	0	-	0	-	0	-	0	-	-	KL122	2	1	2	1	12	1	68	-	-	-	-	-	-	-	-	-	-	-	-	-	-	-	-	-	-	-	-	-	-	-	-
Kp4667	0	rectal	20	0	0	0	0	-	0	-	0	-	0	-	0	-	-	KL63	16	45	21	27	39	22	67	-	-	-	-	-	-	-	-	-	-	-	-	-	-	-	-	-	-	-	-	-	-	-	-
Kp6131	1	rectal	21	0	0	1	0	-	0	-	0	-	0	-	0	-	-	KL24	2	1	1	1	7	1	12	-	-	-	-	-	-	-	-	-	-	-	-	-	-	-	-	-	-	-	-	-	-	-	-
Kp5994	0	rectal	21	0	0	0	0	-	0	-	0	-	0	-	0	-	-	KL30	2	3	2	2	6	4	4	-	-	-	-	-	-	-	-	-	-	-	-	-	-	-	-	-	-	-	-	-	-	-	-
Kp6168	0	rectal	21	0	0	0	0	-	0	-	0	-	0	-	0	-	-	KL103	2	1	1	1	7	4	87	-	-	-	-	-	-	-	-	-	-	-	-	-	-	-	-	-	-	-	-	-	-	-	-
Kp4760	1	rectal	22	1	0	0	0	ybt unknown	0	-	0	-	0	-	0	-	-	KL54	173	18	21	105	76	60	152	44	61	58*	65	40	138*	140*	45*	38	63*	2*	-	-	-	-	-	-	-	-	-	-	-	-	-
Kp4505	0	rectal	22	0	0	1	0	-	0	-	0	-	0	-	0	-	-	KL127 (KL155)	2	1	2	17	16	4	4	-	-	-	-	-	-	-	-	-	-	-	-	-	-	-	-	-	-	-	-	-	-	-	-
Kp5053	0	rectal	22	0	0	0	0	-	0	-	0	-	0	-	0	-	-	KL38	16	18	21	27	39	22	67	-	-	-	-	-	-	-	-	-	-	-	-	-	-	-	-	-	-	-	-	-	-	-	-
Kp8587	1	rectal	23	1	0	1	0	ybt 10; ICEKp4	71	-	0	-	0	-	0	-	-	KL27	2	1	2	1	7	1	7	3	10	4	3	29	111	94	29	10	41	10	-	-	-	-	-	-	-	-	-	-	-	-	-
Kp8554	0	rectal	23	0	0	1	0	-	0	-	0	-	0	-	0	-	-	KL102 (KL149,KL155)	2	1	2	1	7	195	7	-	-	-	-	-	-	-	-	-	-	-	-	-	-	-	-	-	-	-	-	-	-	-	-
Kp9085	0	rectal	23	0	0	1	0	-	0	-	0	-	0	-	0	-	-	KL39 (KL13)	4	1	1	2	12	4	100	-	-	-	-	-	-	-	-	-	-	-	-	-	-	-	-	-	-	-	-	-	-	-	-
Kp8142	1	rectal	25	0	0	1	0	-	0	-	0	-	0	-	0	-	-	KL2 (KL30)	2	1	2	1	60	160	2	-	-	-	-	-	-	-	-	-	-	-	-	-	-	-	-	-	-	-	-	-	-	-	-
Kp7772	0	rectal	25	0	2	2	1	-	0	-	0	-	0	-	0	-	-	-	10	9	2	1	10	1	123	-	-	-	-	-	-	-	-	-	-	-	-	-	-	-	-	-	-	-	-	-	-	-	-
Kp7965	0	rectal	25	0	0	1	0	-	0	-	0	-	0	-	0	-	-	-	18*	22*	39*	108*	11	18*	99	-	-	-	-	-	-	-	-	-	-	-	-	-	-	-	-	-	-	-	-	-	-	-	-
Kp3852	1	rectal	26	0	1	7	10	-	0	-	0	-	0	-	0	-	-	KL102 (KL149,KL155)	4	1	2	52	1	1	7	-	-	-	-	-	-	-	-	-	-	-	-	-	-	-	-	-	-	-	-	-	-	-	-
Kp3604	0	rectal	26	0	0	1	0	-	0	-	0	-	0	-	0	-	-	KL22/KL37	2	3	6	1	9	7	4	-	-	-	-	-	-	-	-	-	-	-	-	-	-	-	-	-	-	-	-	-	-	-	-
Kp3747	0	rectal	26	0	0	1	0	-	0	-	0	-	0	-	0	-	-	KL12	2	3	6	1	9	7	4	-	-	-	-	-	-	-	-	-	-	-	-	-	-	-	-	-	-	-	-	-	-	-	-
Kp9386	1	rectal	202	0	0	0	0	-	0	-	0	-	0	-	0	-	-	KL38	2	1	1	1	9	1	13	-	-	-	-	-	-	-	-	-	-	-	-	-	-	-	-	-	-	-	-	-	-	-	-
Kp9354	0	rectal	202	0	0	0	0	-	0	-	0	-	0	-	0	-	-	-	18	135	26	88	94	13	165*	-	-	-	-	-	-	-	-	-	-	-	-	-	-	-	-	-	-	-	-	-	-	-	-
Kp9689	0	rectal	202	0	1	3	3	-	0	-	0	-	0	-	0	-	-	KL109	4	3	1	36	9	10	14	-	-	-	-	-	-	-	-	-	-	-	-	-	-	-	-	-	-	-	-	-	-	-	-
Kp6421	1	rectal	203	0	0	0	0	-	0	-	0	-	0	-	0	-	-	KL13	29	24	21	27	44	22	85	-	-	-	-	-	-	-	-	-	-	-	-	-	-	-	-	-	-	-	-	-	-	-	-
Kp6020	0	rectal	203	1	0	1	0	ybt 5; ICEKp6	10	-	0	-	0	-	0	-	-	KL22/KL37	2	1	2	1	10	1	19	10	8	10	7	18	4	288	7	8	5	37	-	-	-	-	-	-	-	-	-	-	-	-	-
Kp6051	0	rectal	203	0	0	0	0	-	0	-	0	-	0	-	0	-	-	KL28	2	3	1	1	4	4	4	-	-	-	-	-	-	-	-	-	-	-	-	-	-	-	-	-	-	-	-	-	-	-	-
Kp10769	1	rectal	204	0	1	8	12	-	0	-	0	-	0	-	0	-	-	KL27	3	3	203*	1	1	1	4	-	-	-	-	-	-	-	-	-	-	-	-	-	-	-	-	-	-	-	-	-	-	-	-
Kp10645	0	rectal	204	1	0	0	0	ybt unknown	0	-	0	-	0	-	0	-	-	KL54	173	18	21	105	76	60	152	54	114*	110*	77*	1*	284*	300*	33	77*	48	145*	-	-	-	-	-	-	-	-	-	-	-	-	-
Kp11169	0	rectal	204	0	0	1	0	-	0	-	0	-	0	-	0	-	-	KL17	16	24	43	49	84	29	67	-	-	-	-	-	-	-	-	-	-	-	-	-	-	-	-	-	-	-	-	-	-	-	-
Kp10430	1	rectal	207	0	0	0	0	-	0	-	0	-	0	-	0	-	-	KL2 (KL30)	1	6	1	1	1	1	1	-	-	-	-	-	-	-	-	-	-	-	-	-	-	-	-	-	-	-	-	-	-	-	-
Kp9939	0	rectal	207	1	0	1	0	ybt 10; ICEKp4	78	-	0	-	0	-	0	-	-	KL25	2	1	1	6	7	1	12	3	12	4	11	3	21	18	3	10	16	2	-	-	-	-	-	-	-	-	-	-	-	-	-
Kp10918	0	rectal	207	0	1	3	2	-	0	-	0	-	0	-	0	-	-	KL125 (KL114)	2	1	6	4	1	4	139	-	-	-	-	-	-	-	-	-	-	-	-	-	-	-	-	-	-	-	-	-	-	-	-
Kp6079	1	rectal	208	0	0	0	0	-	0	-	0	-	0	-	0	-	-	-	2	3	2	2	6	152*	4	-	-	-	-	-	-	-	-	-	-	-	-	-	-	-	-	-	-	-	-	-	-	-	-
Kp5622	0	rectal	208	0	0	0	0	-	0	-	0	-	0	-	0	-	-	KL17	2	6	1	1	147	1	31	-	-	-	-	-	-	-	-	-	-	-	-	-	-	-	-	-	-	-	-	-	-	-	-
Kp10262	1	rectal	209	0	1	3	3	-	0	-	0	-	0	-	0	-	-	KL10	2	1	2	1	4	4	4	-	-	-	-	-	-	-	-	-	-	-	-	-	-	-	-	-	-	-	-	-	-	-	-
Kp10201	0	rectal	209	0	1	1	0	-	0	-	0	-	0	-	0	-	-	KL3	10	1	1	1	12	1	38	-	-	-	-	-	-	-	-	-	-	-	-	-	-	-	-	-	-	-	-	-	-	-	-
Kp10256	0	rectal	209	0	0	1	0	-	0	-	0	-	0	-	0	-	-	KL60	2	1	97	1	9	4	13	-	-	-	-	-	-	-	-	-	-	-	-	-	-	-	-	-	-	-	-	-	-	-	-
Kp10653	1	rectal	210	0	1	8	9	-	0	-	0	-	0	-	0	-	-	KL24 (KL54,KL55)	1	1	1	1	1	1	1	-	-	-	-	-	-	-	-	-	-	-	-	-	-	-	-	-	-	-	-	-	-	-	-
Kp10592	0	rectal	210	0	0	0	0	-	0	-	0	-	0	-	0	-	-	KL103	60	18	21	27	53	17	67*	-	-	-	-	-	-	-	-	-	-	-	-	-	-	-	-	-	-	-	-	-	-	-	-
Kp10436	1	rectal	211	0	2	2	2	-	0	-	0	-	0	-	0	-	-	KL27	32	5	1	1	9	4	18	-	-	-	-	-	-	-	-	-	-	-	-	-	-	-	-	-	-	-	-	-	-	-	-
Kp10143	0	rectal	211	0	0	0	0	-	0	-	0	-	0	-	0	-	-	-	16	49	296	38	229	22	569	-	-	-	-	-	-	-	-	-	-	-	-	-	-	-	-	-	-	-	-	-	-	-	-
Kp10506	0	rectal	211	0	0	0	0	-	0	-	0	-	0	-	0	-	-	KL10	2	1	1	1	9	1	13	-	-	-	-	-	-	-	-	-	-	-	-	-	-	-	-	-	-	-	-	-	-	-	-
Kp5120	1	rectal	213	0	0	0	0	-	0	-	0	-	0	-	0	-	-	KL122	2	1	1	1	9	1	13	-	-	-	-	-	-	-	-	-	-	-	-	-	-	-	-	-	-	-	-	-	-	-	-
Kp4712	0	rectal	213	1	0	1	0	ybt 15; ICEKp11	231-1LV	-	0	-	0	-	0	-	-	KL25	2	1	1	1	4	4	4	6	15	22	4	1	37	34*	14	1	33	17	-	-	-	-	-	-	-	-	-	-	-	-	-
Kp5581	0	rectal	213	0	0	0	0	-	0	-	0	-	0	-	0	-	-	KL103	60	18	21	27	53	17	67	-	-	-	-	-	-	-	-	-	-	-	-	-	-	-	-	-	-	-	-	-	-	-	-
Kp3567	1	rectal	214	0	1	1	0	-	0	-	0	-	0	-	0	-	-	KL113	3	1	1	4	7	4	13	-	-	-	-	-	-	-	-	-	-	-	-	-	-	-	-	-	-	-	-	-	-	-	-
Kp3874	0	rectal	214	0	0	3	3	-	0	-	0	-	0	-	0	-	-	KL146	2	1	1	1	27	5	4	-	-	-	-	-	-	-	-	-	-	-	-	-	-	-	-	-	-	-	-	-	-	-	-
Kp3996	0	rectal	214	0	0	0	0	-	0	-	0	-	0	-	0	-	-	-	28	18	21	27	76	22	67*	-	-	-	-	-	-	-	-	-	-	-	-	-	-	-	-	-	-	-	-	-	-	-	-
Kp8184	1	rectal	215	0	0	1	0	-	0	-	0	-	0	-	0	-	-	KL122	2	1	1	1	7	2	12	-	-	-	-	-	-	-	-	-	-	-	-	-	-	-	-	-	-	-	-	-	-	-	-
Kp7994	0	rectal	215	0	0	0	0	-	0	-	0	-	0	-	0	-	-	-	60	18	21	27	53	17	67	-	-	-	-	-	-	-	-	-	-	-	-	-	-	-	-	-	-	-	-	-	-	-	-
Kp8125	0	rectal	215	0	0	0	0	-	0	-	0	-	0	-	0	-	-	KL?	2	5	1	1	7	1	6	-	-	-	-	-	-	-	-	-	-	-	-	-	-	-	-	-	-	-	-	-	-	-	-
Kp4677	1	rectal	216	1	0	1	0	ybt 4; plasmid	65	-	0	-	0	-	0	-	-	KL54	2	1	19	1	9	4	34	23	27	30	18	13	65	61	9	18	26	35	-	-	-	-	-	-	-	-	-	-	-	-	-
Kp4929	0	rectal	216	0	0	1	0	-	0	-	0	-	0	-	0	-	-	KL27	2	1	2	1	7	1	7	-	-	-	-	-	-	-	-	-	-	-	-	-	-	-	-	-	-	-	-	-	-	-	-
Kp5014	0	rectal	216	0	0	0	0	-	0	-	0	-	0	-	0	-	-	KL14	76	1	2	1	7	4	224	-	-	-	-	-	-	-	-	-	-	-	-	-	-	-	-	-	-	-	-	-	-	-	-
Kp10237	1	rectal	217	0	0	2	2	-	0	-	0	-	0	-	0	-	-	KL?	16	28	21	27	47	22	67	-	-	-	-	-	-	-	-	-	-	-	-	-	-	-	-	-	-	-	-	-	-	-	-
Kp9801	0	rectal	217	0	0	3	3	-	0	-	0	-	0	-	0	-	-	KL113	2	1	5	1	17	4	42	-	-	-	-	-	-	-	-	-	-	-	-	-	-	-	-	-	-	-	-	-	-	-	-
Kp9884	0	rectal	217	0	0	1	0	-	0	-	0	-	0	-	0	-	-	KL?	4	1	1	1	20	1	218	-	-	-	-	-	-	-	-	-	-	-	-	-	-	-	-	-	-	-	-	-	-	-	-
Kp8836	1	rectal	218	0	0	1	0	-	0	-	0	-	0	-	0	-	-	KL151 (KL46)	5	1	1	1	9	1	34	-	-	-	-	-	-	-	-	-	-	-	-	-	-	-	-	-	-	-	-	-	-	-	-
Kp8937	0	rectal	218	0	0	1	0	-	0	-	0	-	0	-	0	-	-	KL63	2	1	5	1	17	4	42	-	-	-	-	-	-	-	-	-	-	-	-	-	-	-	-	-	-	-	-	-	-	-	-
Kp11667	1	rectal	301	1	1	7	8	ybt 10; ICEKp4	28	-	0	-	0	-	0	-	-	KL24 (KL54,KL55)	1	1	1	1	1	1	1	16	12	4	3	3	35	50	3	10	23	2	-	-	-	-	-	-	-	-	-	-	-	-	-
Kp9823	0	rectal	301	0	0	0	0	-	0	-	0	-	0	-	0	-	-	KL103	16	18	57	62	76	22	104	-	-	-	-	-	-	-	-	-	-	-	-	-	-	-	-	-	-	-	-	-	-	-	-
Kp11034	0	rectal	301	0	0	3	2	-	0	-	0	-	0	-	0	-	-	KL128	32	5	1	1	9	4	18	-	-	-	-	-	-	-	-	-	-	-	-	-	-	-	-	-	-	-	-	-	-	-	-
Kp10838	1	rectal	302	0	0	3	2	-	0	-	0	-	0	-	0	-	-	-	17	19	79	20	108	55	142	3*	3*	-	-	3*	21*	2*	-	10*	-	-	-	-	-	-	-	-	-	-	-	-	-	-	-
Kp8982	0	rectal	302	0	0	0	0	-	0	-	0	-	0	-	0	-	-	KL10	2	1	1	1	9	1	13	-	-	-	-	-	-	-	-	-	-	-	-	-	-	-	-	-	-	-	-	-	-	-	-
Kp9247	0	rectal	302	0	0	7	9	-	0	-	0	-	0	-	0	-	-	KL38	2	9	2	1	13	1	16	-	-	-	-	-	-	-	-	-	-	-	-	-	-	-	-	-	-	-	-	-	-	-	-
Kp11436	1	rectal	303	0	1	7	11	-	0	-	0	-	0	-	0	-	-	KL23	4	1	2	1	1	114	4	-	-	-	-	-	-	-	-	-	-	-	-	-	-	-	-	-	-	-	-	-	-	-	-
Kp9731	0	rectal	303	0	0	1	0	-	0	-	0	-	0	-	0	-	-	-	17	19	69	39	110	18	148	-	-	-	-	-	-	-	-	-	-	-	-	-	-	-	-	-	-	-	-	-	-	-	-
Kp9828	0	rectal	303	0	0	0	0	-	0	-	0	-	0	-	0	-	-	KL10	2	1	1	1	9	1	13	-	-	-	-	-	-	-	-	-	-	-	-	-	-	-	-	-	-	-	-	-	-	-	-
Kp11262	1	rectal	304	0	0	4	6	-	0	-	0	-	0	-	0	-	-	KL105	16	137	21	154	353	22	74	-	-	-	-	-	-	-	-	-	-	-	-	-	-	-	-	-	-	-	-	-	-	-	-
Kp10543	0	rectal	304	1	0	0	0	ybt unknown	0	-	0	-	0	-	0	-	-	KL19	16	24	36	27	29	22	105	5*	63*	61*	68*	43*	24*	21*	9*	8*	5*	14*	-	-	-	-	-	-	-	-	-	-	-	-	-
Kp11288	1	rectal	305	0	0	1	0	-	0	-	0	-	0	-	0	-	-	KL163 (KL27,KL46)	2	10	13	1	17	4	186	-	-	-	-	-	-	-	-	-	-	-	-	-	-	-	-	-	-	-	-	-	-	-	-
Kp9457	0	rectal	305	0	0	1	0	-	0	-	0	-	0	-	0	-	-	KL?	2	1	5	2	7	4	4	-	-	-	-	-	-	-	-	-	-	-	-	-	-	-	-	-	-	-	-	-	-	-	-
Kp10335	0	rectal	305	0	0	1	0	-	0	-	0	-	0	-	0	-	-	KL136	2	6	17	1	20	10	25	-	-	-	-	-	-	-	-	-	-	-	-	-	-	-	-	-	-	-	-	-	-	-	-
Kp8526	1	rectal	401	0	0	0	0	-	0	-	0	-	0	-	0	-	-	KL28	2	3	1	1	4	4	4	-	-	-	-	-	-	-	-	-	-	-	-	-	-	-	-	-	-	-	-	-	-	-	-
Kp8253	0	rectal	401	0	0	1	0	-	0	-	0	-	0	-	0	-	-	KL3	2	1	2	1	1	4	42	-	-	-	-	-	-	-	-	-	-	-	-	-	-	-	-	-	-	-	-	-	-	-	-
Kp8894	0	rectal	401	1	0	0	0	ybt 4; plasmid	34-2LV	-	0	-	0	-	0	-	-	-	2	1	1	1	3	1	34	18	20	27	18	13	41	71	22	8	26	46*	-	-	-	-	-	-	-	-	-	-	-	-	-
Kp10379	1	rectal	403	0	0	1	0	-	0	-	0	-	0	-	0	-	-	-	40	23	234	111	11	38	99	-	-	-	-	-	-	-	-	-	-	-	-	-	-	-	-	-	-	-	-	-	-	-	-
Kp10269	0	rectal	403	0	0	0	0	-	0	-	0	-	0	-	0	-	-	KL57	16	24	21	27	54	22	103	-	-	-	-	-	-	-	-	-	-	-	-	-	-	-	-	-	-	-	-	-	-	-	-
Kp10300	0	rectal	403	0	0	0	0	-	0	-	0	-	0	-	0	-	-	KL163 (KL27,KL46)	2	1	2	1	12	1	68	-	-	-	-	-	-	-	-	-	-	-	-	-	-	-	-	-	-	-	-	-	-	-	-
Kp3859	1	rectal	404	0	0	1	0	-	0	-	0	-	0	-	0	-	-	KL18	3	1	1	1	9	4	135	-	-	-	-	-	-	-	-	-	-	-	-	-	-	-	-	-	-	-	-	-	-	-	-
Kp4211	0	rectal	404	0	0	0	0	-	0	-	0	-	0	-	0	-	-	KL110	2	1	1	1	9	1	18	-	-	-	-	-	-	-	-	-	-	-	-	-	-	-	-	-	-	-	-	-	-	-	-
Kp10372	1	rectal	405	5	2	2	1	ybt 1; ICEKp10	57	clb 2	29	iuc 1	1	-	0	rmpA_2(KpVP-1)	rmpA2_6-60%	KL1	2	1	1	1	9	4	12	2	2	2	2	2	6	6	49	2	2	2	2	2	2	2	2	2	2	3	2	2	2	2	2
Kp10197	0	rectal	405	1	0	0	0	ybt 14; ICEKp5	135-1LV	-	0	-	0	-	0	-	-	KL28	2	3	1	1	4	4	4	4	4	18	4	1	27	25*	2	4	4	2	-	-	-	-	-	-	-	-	-	-	-	-	-
Kp10384	0	rectal	405	0	0	1	0	-	0	-	0	-	0	-	0	-	-	KL118	2	9	2	1	13	1	16	-	-	-	-	-	-	-	-	-	-	-	-	-	-	-	-	-	-	-	-	-	-	-	-
Kp3176	1	rectal	406	1	0	1	0	ybt 10; ICEKp4	71	-	0	-	0	-	0	-	-	KL27	2	1	2	1	7	1	7	3	10	4	3	29	111	94	29	10	41	10	-	-	-	-	-	-	-	-	-	-	-	-	-
Kp3054	0	rectal	406	0	0	0	0	-	0	-	0	-	0	-	0	-	-	KL17	16	1	21	38	47	60	103	-	-	-	-	-	-	-	-	-	-	-	-	-	-	-	-	-	-	-	-	-	-	-	-
Kp9235	1	rectal	407	1	0	2	1	ybt 10; ICEKp4	78	-	0	-	0	-	0	-	-	KL24	2	1	1	6	7	1	12	3	12	4	11	3	21	18	3	10	16	2	-	-	-	-	-	-	-	-	-	-	-	-	-
Kp9030	0	rectal	407	0	0	0	0	-	0	-	0	-	0	-	0	-	-	KL114	2	1	2	1	12	1	68	-	-	-	-	-	-	-	-	-	-	-	-	-	-	-	-	-	-	-	-	-	-	-	-
Kp9164	0	rectal	407	0	0	0	0	-	0	-	0	-	0	-	0	-	-	KL107	16	18	21	27	39	22	67	-	-	-	-	-	-	-	-	-	-	-	-	-	-	-	-	-	-	-	-	-	-	-	-
Kp6373	1	rectal	409	0	0	1	0	-	0	-	0	-	0	-	0	-	-	KL16 (KL143)	10	1	11	1	26	8	43	-	-	-	-	-	-	-	-	-	-	-	-	-	-	-	-	-	-	-	-	-	-	-	-
Kp6320	0	rectal	409	0	0	1	0	-	0	-	0	-	0	-	0	-	-	KL2 (KL30)	2	1	4	34	1	1	2	-	-	-	-	-	-	-	-	-	-	-	-	-	-	-	-	-	-	-	-	-	-	-	-
Kp6690	0	rectal	409	0	0	1	0	-	0	-	0	-	0	-	0	-	-	KL163 (KL27,KL46)	14	3	2	287	9	1	9	-	-	-	-	-	-	-	-	-	-	-	-	-	-	-	-	-	-	-	-	-	-	-	-
Kp7998	1	rectal	411	0	0	0	0	-	0	-	0	-	0	-	0	-	-	KL31	3	1	1	3	4	28	39	-	-	-	-	-	-	-	-	-	-	-	-	-	-	-	-	-	-	-	-	-	-	-	-
Kp8267	0	rectal	411	0	0	1	0	-	0	-	0	-	0	-	0	-	-	KL2 (KL30)	2	1	2	1	60	160	2	-	-	-	-	-	-	-	-	-	-	-	-	-	-	-	-	-	-	-	-	-	-	-	-
Kp8374	0	rectal	411	0	0	0	0	-	0	-	0	-	0	-	0	-	-	-	16	24	21	27	54	22	45	-	-	-	-	-	-	-	-	-	-	-	-	-	-	-	-	-	-	-	-	-	-	-	-
Kp10289	1	rectal	412	2	1	7	9	ybt 17; ICEKp10	267-2LV	clb 3	19	-	0	-	0	-	-	KL27	3	3	1	1	1	1	4	6	15	5	13	11	28*	26*	2	11	4	2	2	10	2	2	2	4	2	8	2	2	2	2	2
Kp10144	0	rectal	412	0	0	0	0	-	0	-	0	-	0	-	0	-	-	-	16	49	296	38	229	22	569	-	-	-	-	-	-	-	-	-	-	-	-	-	-	-	-	-	-	-	-	-	-	-	-
Kp10521	0	rectal	412	0	0	1	0	-	0	-	0	-	0	-	0	-	-	KL5	2	3	2*	161	4	1	15	-	-	-	-	-	-	-	-	-	-	-	-	-	-	-	-	-	-	-	-	-	-	-	-
Kp3430	1	rectal	413	0	2	5	6	-	0	-	0	-	0	-	0	-	-	KL125	4	1	37	1*	3	4	39	-	-	-	-	-	-	-	-	-	-	-	-	-	-	-	-	-	-	-	-	-	-	-	-
Kp3474	0	rectal	413	0	0	1	0	-	0	-	0	-	0	-	0	-	-	KL102 (KL149,KL155)	2	1	2	1	7	1	7	-	-	-	-	-	-	-	-	-	-	-	-	-	-	-	-	-	-	-	-	-	-	-	-
Kp3773	0	rectal	413	0	0	0	0	-	0	-	0	-	0	-	0	-	-	KL125	2	1	2	1	12	1	68	-	-	-	-	-	-	-	-	-	-	-	-	-	-	-	-	-	-	-	-	-	-	-	-
Kp4289	1	rectal	414	4	0	0	0	ybt 14; ICEKp12	143-1LV	-	0	iuc 2	14-1LV	iro 2	12-1LV	rmpA_3(KpVP-2)	-	KL2	2	1	1	1	1	4	19	4*	4	5	4	1	162	164	2	4	74	2	-	-	-	-	-	-	-	-	-	-	-	-	-
Kp4236	0	rectal	414	0	0	1	0	-	0	-	0	-	0	-	0	-	-	-	18	22	26	71	169*	13	49	-	-	-	-	-	-	-	-	-	-	-	-	-	-	-	-	-	-	-	-	-	-	-	-
Kp3155	1	rectal	415	1	1	8	10	ybt 10; ICEKp4	104-1LV	-	0	-	0	-	0	-	-	KL48	1	1	1	1	1	1	1	3	3	4	3	17	56	7	18	3	3	32*	-	-	-	-	-	-	-	-	-	-	-	-	-
Kp2837	0	rectal	415	0	0	1	0	-	0	-	0	-	0	-	0	-	-	KL147 (KL112)	2	3	1	20	4	1	4	-	-	-	-	-	-	-	-	-	-	-	-	-	-	-	-	-	-	-	-	-	-	-	-
Kp3197	0	rectal	415	0	0	0	0	-	0	-	0	-	0	-	0	-	-	KL?	16	24	21	27	29	22	200	-	-	-	-	-	-	-	-	-	-	-	-	-	-	-	-	-	-	-	-	-	-	-	-
Kp8382	1	rectal	417	0	0	0	0	-	0	-	0	-	0	-	0	-	-	-	16	24	21	106	68	59	188	-	-	-	-	-	-	-	-	-	-	-	-	-	-	-	-	-	-	-	-	-	-	-	-
Kp8879	0	rectal	417	0	0	0	0	-	0	-	0	-	0	-	0	-	-	-	16	24	21	31	47	93	618	-	-	-	-	-	-	-	-	-	-	-	-	-	-	-	-	-	-	-	-	-	-	-	-
Kp4956	1	rectal	418	0	0	1	0	-	0	-	0	-	0	-	0	-	-	KL19	2	3	1	1	4	1	4	-	-	-	-	-	-	-	-	-	-	-	-	-	-	-	-	-	-	-	-	-	-	-	-
Kp4753	0	rectal	418	1	0	1	0	ybt 4; plasmid	29-2LV	-	0	-	0	-	0	-	-	KL28	2	1	10	1	1	10	25	18	20	27*	18	13*	41	38	9	8	26	22	-	-	-	-	-	-	-	-	-	-	-	-	-
Kp5138	0	rectal	418	0	0	1	1	-	0	-	0	-	0	-	0	-	-	KL30	2	3	2	2	6	4	4	-	-	-	-	-	-	-	-	-	-	-	-	-	-	-	-	-	-	-	-	-	-	-	-
Kp11628	1	rectal	501	0	0	0	0	-	0	-	0	-	0	-	0	-	-	KL38	4	1	2	1	1	7	4	-	-	-	-	-	-	-	-	-	-	-	-	-	-	-	-	-	-	-	-	-	-	-	-
Kp10743	0	rectal	501	0	1	6	5	-	0	-	0	-	0	-	0	-	-	KL140	4	3	1	36	9	10	14	-	-	-	-	-	-	-	-	-	-	-	-	-	-	-	-	-	-	-	-	-	-	-	-
Kp11018	0	rectal	501	0	0	1	0	-	0	-	0	-	0	-	0	-	-	KL10	88	22	63	22	107	38	114	-	-	-	-	-	-	-	-	-	-	-	-	-	-	-	-	-	-	-	-	-	-	-	-
Kp11407	1	rectal	502	1	1	7	6	ybt 10; ICEKp4	20-2LV	-	0	-	0	-	0	-	-	KL64	3	4	6	1	7	4	38	16	12	4	3	3	61	54	3	10	9	39	-	-	-	-	-	-	-	-	-	-	-	-	-
Kp10480	0	rectal	502	0	1	3	3	-	0	-	0	-	0	-	0	-	-	-	14	1	2	1	135	4	12	-	-	-	-	-	-	-	-	-	-	-	-	-	-	-	-	-	-	-	-	-	-	-	-
Kp10550	0	rectal	502	0	0	0	0	-	0	-	0	-	0	-	0	-	-	KL16 (KL143)	2	1	1	1*	9	1	13	-	-	-	-	-	-	-	-	-	-	-	-	-	-	-	-	-	-	-	-	-	-	-	-
Kp3882	1	rectal	503	0	0	1	0	-	0	-	0	-	0	-	0	-	-	KL125 (KL114)	2	1	20	2	1	1	10	-	-	-	-	-	-	-	-	-	-	-	-	-	-	-	-	-	-	-	-	-	-	-	-
Kp2709	0	rectal	503	0	0	1	0	-	0	-	0	-	0	-	0	-	-	KL22/KL37 (KL8,KL30,KL151)	3	4	1	1	1	5	91	-	-	-	-	-	-	-	-	-	-	-	-	-	-	-	-	-	-	-	-	-	-	-	-
Kp4817	0	rectal	503	0	0	1	0	-	0	-	0	-	0	-	0	-	-	-	18	23	56	63	80	43	51	-	-	-	-	-	-	-	-	-	-	-	-	-	-	-	-	-	-	-	-	-	-	-	-
Kp5478	1	rectal	504	0	0	1	0	-	0	-	0	-	0	-	0	-	-	KL?	2	60	11	1	4	8	24	-	-	-	-	-	-	-	-	-	-	-	-	-	-	-	-	-	-	-	-	-	-	-	-
Kp3967	0	rectal	504	0	1	1	0	-	0	-	0	-	0	-	0	-	-	KL?	2	4	2	1	7	1	46	-	-	-	-	-	-	-	-	-	-	-	-	-	-	-	-	-	-	-	-	-	-	-	-
Kp4733	0	rectal	504	0	1	4	3	-	0	-	0	-	0	-	0	-	-	-	17	19	28	20	108	21	52	-	-	-	-	-	-	-	-	-	-	-	-	-	-	-	-	-	-	-	-	-	-	-	-
Kp11162	1	rectal	505	0	2	6	11	-	0	-	0	-	0	-	0	-	-	KL61	60	18	21	27	53	17	67	-	-	-	-	-	-	-	-	-	-	-	-	-	-	-	-	-	-	-	-	-	-	-	-
Kp10120	0	rectal	505	0	0	0	0	-	0	-	0	-	0	-	0	-	-	KL60	2	1	1	1	9	1	13	-	-	-	-	-	-	-	-	-	-	-	-	-	-	-	-	-	-	-	-	-	-	-	-
Kp10440	0	rectal	505	0	0	0	0	-	0	-	0	-	0	-	0	-	-	KL19	16	18	21	38	78	22	67	-	-	-	-	-	-	-	-	-	-	-	-	-	-	-	-	-	-	-	-	-	-	-	-
Kp4705	1	rectal	701	0	0	1	0	-	0	-	0	-	0	-	0	-	-	KL28	4	5	1	2	12	4	487	-	-	-	-	-	-	-	-	-	-	-	-	-	-	-	-	-	-	-	-	-	-	-	-
Kp4591	0	rectal	701	0	0	1	0	-	0	-	0	-	0	-	0	-	-	KL163 (KL27,KL46)	2	3	1	1	10	1	23	-	-	-	-	-	-	-	-	-	-	-	-	-	-	-	-	-	-	-	-	-	-	-	-
Kp4745	0	rectal	701	0	0	0	0	-	0	-	0	-	0	-	0	-	-	KL14	4	40	2	26*	7	4	224	-	-	-	3*	-	-	-	-	-	-	-	-	-	-	-	-	-	-	-	-	-	-	-	-
Kp6733	1	rectal	702	0	0	1	0	-	0	-	0	-	0	-	0	-	-	KL23 (KL18, KL38)	2	3	1	1	9	10	4	-	-	-	-	-	-	-	-	-	-	-	-	-	-	-	-	-	-	-	-	-	-	-	-
Kp6805	0	rectal	702	1	0	0	0	ybt 4; plasmid	65-1LV	-	0	-	0	-	0	-	-	-	16	18	43	138	42	33	404*	23	27	30	18	13	65*	61	9	18	26	35	-	-	-	-	-	-	-	-	-	-	-	-	-
Kp6840	0	rectal	702	0	0	0	0	-	0	-	0	-	0	-	0	-	-	KL47	16	24	30	270	90	22	45	-	-	-	-	-	-	-	-	-	-	-	-	-	-	-	-	-	-	-	-	-	-	-	-
Kp5078	1	rectal	703	0	0	1	0	-	0	-	0	-	0	-	0	-	-	-	2	1	2	1	7	1	7	-	-	-	-	-	-	-	-	-	-	-	-	-	-	-	-	-	-	-	-	-	-	-	-
Kp4955	0	rectal	703	1	0	2	1	ybt 10; ICEKp4	95-1LV	-	0	-	0	-	0	-	-	KL20	2	1	2	1	7	1	81	3	12	4	66	3	137	139	3	10	60	2*	-	-	-	-	-	-	-	-	-	-	-	-	-
Kp5184	0	rectal	703	0	0	0	0	-	0	-	0	-	0	-	0	-	-	KL102	2	3	2	1	1	4	18	-	-	-	-	-	-	-	-	-	-	-	-	-	-	-	-	-	-	-	-	-	-	-	-
Kp10406	1	rectal	704	0	0	1	0	-	0	-	0	-	0	-	0	-	-	KL101	17	73	39	20	113	21	52	-	-	-	-	-	-	-	-	-	-	-	-	-	-	-	-	-	-	-	-	-	-	-	-
Kp10482	0	rectal	704	0	0	1	0	-	0	-	0	-	0	-	0	-	-	KL22/KL37	2	1	2	1	10	1	19	-	-	-	-	-	138*	9*	-	77*	-	-	-	-	-	-	-	-	-	-	-	-	-	-	-
Kp10614	0	rectal	704	0	0	0	0	-	0	-	0	-	0	-	0	-	-	KL133	2	1	1	1	9	1	12	-	-	-	-	-	-	-	-	-	-	-	-	-	-	-	-	-	-	-	-	-	-	-	-
Kp10193	1	rectal	706	0	1	8	11	-	0	-	0	-	0	-	0	-	-	KL58	71	1	1	35	16	4	4	-	-	-	-	-	-	-	-	-	-	-	-	-	-	-	-	-	-	-	-	-	-	-	-
Kp9983	0	rectal	706	0	0	0	0	-	0	-	0	-	0	-	0	-	-	KL6	16	49	30	38	90	22	45	-	-	-	-	-	-	-	-	-	-	-	-	-	-	-	-	-	-	-	-	-	-	-	-
Kp9918	1	rectal	707	0	0	0	0	-	0	-	0	-	0	-	0	-	-	KL54	16	18	30	27	68	59	67	-	-	-	-	-	-	-	-	-	-	-	-	-	-	-	-	-	-	-	-	-	-	-	-
Kp9861	0	rectal	707	0	0	0	0	-	0	-	0	-	0	-	0	-	-	KL?	4	1	2	1	1	7	23	-	-	-	-	-	-	-	-	-	-	-	-	-	-	-	-	-	-	-	-	-	-	-	-
Kp10367	0	rectal	707	0	0	1	0	-	0	-	0	-	0	-	0	-	-	-	2	9	2	1	9	1	4	-	-	-	-	-	-	-	-	-	-	-	-	-	-	-	-	-	-	-	-	-	-	-	-
Kp4635	1	rectal	708	0	0	5	8	-	0	-	0	-	0	-	0	-	-	-	4	1	10	1	196	4	256	-	-	-	-	-	-	-	-	-	-	-	-	-	-	-	-	-	-	-	-	-	-	-	-
Kp4280	0	rectal	708	0	0	1	0	-	0	-	0	-	0	-	0	-	-	KL113?	18	22	26	64	31	20	268	-	-	-	-	-	-	-	-	-	-	-	-	-	-	-	-	-	-	-	-	-	-	-	-
Kp4467	0	rectal	708	0	1	1	0	-	0	-	0	-	0	-	0	-	-	KL30 (KL2, KL8, KL111)	2	1	2	1	7	1	24	-	-	-	-	-	-	-	-	-	-	-	-	-	-	-	-	-	-	-	-	-	-	-	-
Kp6928	1	rectal	709	0	0	1	0	-	0	-	0	-	0	-	0	-	-	KL7	6	1	2	1	1	1	14	-	-	-	-	-	-	-	-	-	-	-	-	-	-	-	-	-	-	-	-	-	-	-	-
Kp6535	0	rectal	709	0	0	1	0	-	0	-	0	-	0	-	0	-	-	KL62	2	1	1	26	12	15	138	-	-	-	-	-	-	-	-	-	-	-	-	-	-	-	-	-	-	-	-	-	-	-	-
Kp7021	0	rectal	709	1	0	1	0	ybt 10; ICEKp4	91-4LV	-	0	-	0	-	0	-	-	KL151	2	1	62	3	10	4	110	3	12	4	3	3*	85*	85	3	10	9	11*	-	-	-	-	-	-	-	-	-	-	-	-	-
Kp9364	1	rectal	710	1	0	0	0	ybt unknown	0	-	0	-	0	-	0	-	-	KL16	16	24	21	27	55	22	67	18	27	30*	18	44	156*	154*	9	8*	26	35	-	-	-	-	-	-	-	-	-	-	-	-	-
Kp9077	0	rectal	710	0	0	1	0	-	0	-	0	-	0	-	0	-	-	KL38	2	9	2	1	13	1	16	-	-	-	-	-	-	-	-	-	-	-	-	-	-	-	-	-	-	-	-	-	-	-	-
Kp9421	0	rectal	710	1	0	3	3	ybt unknown	0	-	0	-	0	-	0	-	-	KL25	2	1	1	1	4	4	4	44*	61	73	65	40	182*	140*	45*	38	63	2	-	-	-	-	-	-	-	-	-	-	-	-	-
Kp4468	1	rectal	711	0	0	0	0	-	0	-	0	-	0	-	0	-	-	KL30	2	1	1	1	9	1	13	-	-	-	-	-	-	-	-	-	-	-	-	-	-	-	-	-	-	-	-	-	-	-	-
Kp4140	0	rectal	711	0	0	0	0	-	0	-	0	-	0	-	0	-	-	KL39 (KL13)	2	1	2	1	12	1	68	-	-	-	-	-	-	-	-	-	-	-	-	-	-	-	-	-	-	-	-	-	-	-	-
Kp4459	0	rectal	711	0	0	1	0	-	0	-	0	-	0	-	0	-	-	KL117	2	7	2	1	2	1	2	-	-	-	-	-	-	-	-	-	-	-	-	-	-	-	-	-	-	-	-	-	-	-	-
Kp4819	1	rectal	712	0	0	2	1	-	0	-	0	-	0	-	0	-	-	KL?	2	1	2	1	13	1	23	-	-	-	-	-	-	-	-	-	-	-	-	-	-	-	-	-	-	-	-	-	-	-	-
Kp5060	0	rectal	712	0	0	0	0	-	0	-	0	-	0	-	0	-	-	KL6	16	49	30	38	90	22	45	-	-	-	-	-	-	-	-	-	-	-	-	-	-	-	-	-	-	-	-	-	-	-	-
Kp5123	0	rectal	712	0	0	0	0	-	0	-	0	-	0	-	0	-	-	KL19	2	1	65	1	285	4	9	-	-	-	-	-	-	-	-	-	-	-	-	-	-	-	-	-	-	-	-	-	-	-	-
Kp5854	1	rectal	713	0	1	7	11	-	0	-	0	-	0	-	0	-	-	KL102 (KL149,KL155)	4	1	2	52	1	1	7	-	-	-	-	-	-	-	-	-	-	-	-	-	-	-	-	-	-	-	-	-	-	-	-
Kp5477	0	rectal	713	0	0	1	0	-	0	-	0	-	0	-	0	-	-	KL58	2	1	2	1	1	4	42*	-	-	-	-	-	-	-	-	-	-	-	-	-	-	-	-	-	-	-	-	-	-	-	-
Kp6126	0	rectal	713	0	0	0	0	-	0	-	0	-	0	-	0	-	-	KL28	2	1	1	1	9	1	59*	-	-	-	-	-	-	-	-	-	-	-	-	-	-	-	-	-	-	-	-	-	-	-	-
Kp6070	1	rectal	715	0	1	1	0	-	0	-	0	-	0	-	0	-	-	KL30	2	3	1	1	10	1	19	-	-	-	-	-	-	-	-	-	-	-	-	-	-	-	-	-	-	-	-	-	-	-	-
Kp5803	0	rectal	715	0	0	1	0	-	0	-	0	-	0	-	0	-	-	KL149	2	3	1	1	9	10	4	-	-	-	-	-	-	-	-	-	-	-	-	-	-	-	-	-	-	-	-	-	-	-	-
Kp6032	0	rectal	715	0	1	1	0	-	0	-	0	-	0	-	0	-	-	KL27	4	1	5	1	129	11	24	-	-	-	-	-	-	-	-	-	-	-	-	-	-	-	-	-	-	-	-	-	-	-	-
Kp4888	1	rectal	716	1	0	1	1	ybt 10; ICEKp4	78	-	0	-	0	-	0	-	-	KL24	2	1	1	6	7	1	12	3	12	4	11	3	21	18	3	10	16	2	-	-	-	-	-	-	-	-	-	-	-	-	-
Kp4500	0	rectal	716	0	0	1	0	-	0	-	0	-	0	-	0	-	-	KL134	2	3	87	1	12	1	26	-	-	-	-	-	-	-	-	-	-	-	-	-	-	-	-	-	-	-	-	-	-	-	-
Kp4938	0	rectal	716	0	0	0	0	-	0	-	0	-	0	-	0	-	-	KL39 (KL13)	2	5	1	1	10	1	46	-	-	-	-	-	-	-	-	-	-	-	-	-	-	-	-	-	-	-	-	-	-	-	-
Kp3360	1	rectal	717	0	0	0	0	-	0	-	0	-	0	-	0	-	-	KL28	2	3	1	1	4	4	4	-	-	-	-	-	-	-	-	-	-	-	-	-	-	-	-	-	-	-	-	-	-	-	-
Kp3577	0	rectal	717	0	0	1	0	-	0	-	0	-	0	-	0	-	-	KL15 (KL17,KL51,KL52)	2	5	1	1	12	1	18	-	-	-	-	-	-	-	-	-	-	-	-	-	-	-	-	-	-	-	-	-	-	-	-
Kp3707	0	rectal	717	0	0	1	2	-	0	-	0	-	0	-	0	-	-	KL151	16	18	30	49	47	22	67	-	-	-	-	-	-	-	-	-	-	-	-	-	-	-	-	-	-	-	-	-	-	-	-
Kp7238	1	rectal	718	0	0	0	0	-	0	-	0	-	0	-	0	-	-	KL5	12	6	1	3	8	5	18	-	-	-	-	-	-	-	-	-	-	-	-	-	-	-	-	-	-	-	-	-	-	-	-
Kp7201	0	rectal	718	0	0	1	0	-	0	-	0	-	0	-	0	-	-	-	2	1	97	1	9	4	13	-	-	-	-	-	-	-	-	-	-	-	-	-	-	-	-	-	-	-	-	-	-	-	-
Kp7307	0	rectal	718	0	0	0	0	-	0	-	0	-	0	-	0	-	-	KL28	2	3	1	1	4	4	4	-	-	-	-	-	-	-	-	-	-	-	-	-	-	-	-	-	-	-	-	-	-	-	-
Kp8324	1	rectal	719	0	0	0	0	-	0	-	0	-	0	-	0	-	-	KL35?	3	1	1	3	4	28	39	-	-	-	-	-	-	-	-	-	-	-	-	-	-	-	-	-	-	-	-	-	-	-	-
Kp7902	0	rectal	719	0	0	1	0	-	0	-	0	-	0	-	0	-	-	KL15 (KL17,KL51,KL52)	2	53	3	1	10	4	18	-	-	-	-	-	-	-	-	-	-	-	-	-	-	-	-	-	-	-	-	-	-	-	-
Kp8152	0	rectal	719	0	0	0	0	-	0	-	0	-	0	-	0	-	-	-	2	1	2	1	12	1	68	-	-	-	-	-	-	-	-	-	-	-	-	-	-	-	-	-	-	-	-	-	-	-	-
Kp9311	1	rectal	720	0	0	2	0	-	0	-	0	-	0	-	0	-	-	KL146	2	1	1	1	27	5	4	-	-	-	-	-	-	-	-	-	-	-	-	-	-	-	-	-	-	-	-	-	-	-	-
Kp8880	0	rectal	720	0	0	0	0	-	0	-	0	-	0	-	0	-	-	KL?	60	24	21	53	54	22	172	-	-	-	-	-	-	-	-	-	-	-	-	-	-	-	-	-	-	-	-	-	-	-	-
Kp9001	0	rectal	720	0	0	1	0	-	0	-	0	-	0	-	0	-	-	-	2	3	6	1	9	7	4	-	-	-	-	-	-	-	-	-	-	-	-	-	-	-	-	-	-	-	-	-	-	-	-
Kp7447	1	rectal	721	0	0	0	0	-	0	-	0	-	0	-	0	-	-	KL12	2	1	1	1	9	1	13	-	-	-	-	-	-	-	-	-	-	-	-	-	-	-	-	-	-	-	-	-	-	-	-
Kp7160	0	rectal	721	0	1	6	6	-	0	-	0	-	0	-	0	-	-	-	4	1	1	1	21	1	35	-	-	-	-	-	-	-	-	-	-	-	-	-	-	-	-	-	-	-	-	-	-	-	-
Kp7360	0	rectal	721	0	0	0	0	-	0	-	0	-	0	-	0	-	-	KL16 (KL143)	1	6	1	1	1	1	1	-	-	-	-	-	-	-	-	-	-	-	-	-	-	-	-	-	-	-	-	-	-	-	-
Kp9426	1	rectal	722	0	0	0	0	-	0	-	0	-	0	-	0	-	-	KL27	2	1	2	1	9	10	18	-	-	-	-	-	-	-	-	-	-	-	-	-	-	-	-	-	-	-	-	-	-	-	-
Kp9270	0	rectal	722	1	1	1	0	ybt 4; plasmid	329-4LV	-	0	-	0	-	0	-	-	KL47	4	3	1	36	9	10	14	18	20	27	31*	13	41	71*	9	8	26	35*	-	-	-	-	-	-	-	-	-	-	-	-	-
Kp9400	0	rectal	722	0	0	5	6	-	0	-	0	-	0	-	0	-	-	KL?	18	19	148	114	122*	21	276	-	-	-	-	-	-	-	-	-	-	-	-	-	-	-	-	-	-	-	-	-	-	-	-
Kp4650	1	rectal	723	0	0	1	0	-	0	-	0	-	0	-	0	-	-	KL?	2	60	11	1	4	8	24	-	-	-	-	-	-	-	-	-	-	-	-	-	-	-	-	-	-	-	-	-	-	-	-
Kp4341	0	rectal	723	0	0	0	0	-	0	-	0	-	0	-	0	-	-	KL28	2	3	1	1	4	4	4	-	-	-	-	-	-	-	-	-	-	-	-	-	-	-	-	-	-	-	-	-	-	-	-
Kp4722	0	rectal	723	1	0	2	0	ybt 10; ICEKp4	20-2LV	-	0	-	0	-	0	-	-	KL64	3	4	6	1	7	4	38	16	12	4	3	3	61	54	3	10	9	39	-	-	-	-	-	-	-	-	-	-	-	-	-
Kp6146	1	rectal	724	0	0	0	0	-	0	-	0	-	0	-	0	-	-	KL113	16	18	21	27	153	40	85	-	-	-	-	-	-	-	-	-	-	-	-	-	-	-	-	-	-	-	-	-	-	-	-
Kp5871	0	rectal	724	0	0	4	5	-	0	-	0	-	0	-	0	-	-	KL2 (KL30)	1	6	1	1	1	1	1	-	-	-	-	-	-	-	-	-	-	-	-	-	-	-	-	-	-	-	-	-	-	-	-
Kp6557	0	rectal	724	5	0	1	0	ybt 1; ICEKp10	46	clb 2	29	iuc 1	1	iro 1	2	rmpA_2*(KpVP-1)	rmpA2_8-60%	KL1	2	1	1	1	9	4	12	2	2	2	2	2	36	6	2	2	2	2	2	2	2	2	2	2	2	3	2	2	2	2	2
Kp10638	1	rectal	801	0	0	0	0	-	0	-	0	-	0	-	0	-	-	KL163 (KL27,KL46)	2	3	2	1	1	4	56	-	-	-	-	-	-	-	-	-	-	-	-	-	-	-	-	-	-	-	-	-	-	-	-
Kp9149	0	rectal	801	0	0	0	0	-	0	-	0	-	0	-	0	-	-	KL163 (KL27,KL46)	2	3	5	1	12	4	9	-	-	-	-	-	-	-	-	-	-	-	-	-	-	-	-	-	-	-	-	-	-	-	-
Kp9726	0	rectal	801	0	0	0	0	-	0	-	0	-	0	-	0	-	-	KL113	2	3	2	2	6	4	4	-	-	-	-	-	-	-	-	-	-	-	-	-	-	-	-	-	-	-	-	-	-	-	-
Kp11488	1	rectal	802	1	1	8	10	ybt 9; ICEKp3	192-3LV	-	0	-	0	-	0	-	-	KL?	10	5	1	4	6	4	4	5	43	6	5*	1	107*	65	9	5	5	11	-	-	-	-	-	-	-	-	-	-	-	-	-
Kp10318	0	rectal	802	1	0	1	0	ybt 10; ICEKp4	95	-	0	-	0	-	0	-	-	KL22/KL37	2	1	2	1	10	50	120	3	12	4	66	3	137	139	3	10	60	65	-	-	-	-	-	-	-	-	-	-	-	-	-
Kp11172	0	rectal	802	0	0	1	1	-	0	-	0	-	0	-	0	-	-	KL19	16	18	45	67*	106	93	404	-	-	-	-	-	-	-	-	-	-	-	-	-	-	-	-	-	-	-	-	-	-	-	-
[truncated: 31 more columns]
